# Supplementary material
Source: PubMed Central journal article supplement (PMC3346412)
Supplement: supp_78.11.3824_AEM-AEM00051-12-s01.pdf [file supp_78.11.3824_AEM-AEM00051-12-s01.pdf]

TABLE S1. *Listeria monocytogenes* genes transcribed at higher levels<sup>a</sup> at 7°C compared to 37°C

| Name <sup>b</sup>       | Gene Function <sup>c</sup>                                                     | Fold change <sup>d</sup> (7°C/37°C) |                  |
|-------------------------|--------------------------------------------------------------------------------|-------------------------------------|------------------|
|                         |                                                                                | Log phase                           | Stationary phase |
| lmo0005 ( <i>recF</i> ) | RecF protein                                                                   | 2.14 ***                            | -                |
| lmo0013 ( <i>qoxA</i> ) | AA3-600 quinol oxidase subunit II                                              | 2.05 **                             | -                |
| lmo0019                 | unknown                                                                        | -                                   | 5.10 ***         |
| lmo0042                 | similar to <i>E. coli</i> DedA protein                                         | 4.48 ***                            | -                |
| lmo0047                 | unknown                                                                        | 2.99 ***                            | 2.82 *           |
| lmo0066                 | similar to toxin components                                                    | -                                   | 2.66 ***         |
| lmo0076                 | similar to <i>E. coli</i> Ada protein (O6-methylguanine-DNA methyltransferase) | -                                   | 2.68 ***         |
| lmo0114                 | similar to putative repressor C1 from lactococcal bacteriophage Tuc2009        | -                                   | 2.02 ***         |
| lmo0117 ( <i>lmaB</i> ) | antigen B                                                                      | 7.36 ***                            | -                |
| lmo0118 ( <i>lmaA</i> ) | antigen A                                                                      | 5.08 ***                            | -                |
| lmo0119                 | unknown                                                                        | 5.98 ***                            | -                |
| lmo0120                 | unknown                                                                        | 6.12 ***                            | -                |
| lmo0121                 | similar to bacteriophage minor tail proteins                                   | 3.47 ***                            | -                |
| lmo0122                 | similar to phage proteins                                                      | -                                   | 2.03 ***         |
| lmo0123                 | similar to protein gp18 from Bacteriophage A118                                | 4.35 ***                            | -                |
| lmo0124                 | unknown                                                                        | 3.13 ***                            | -                |
| lmo0125                 | unknown                                                                        | 3.40 ***                            | -                |
| lmo0126                 | unknown                                                                        | 4.81 ***                            | -                |
| lmo0127                 | weakly similar to protein gp20 from Bacteriophage A118                         | 3.50 ***                            | -                |
| lmo0129                 | similar to autolysin: N-acetylmuramoyl-L-alanine amidase                       | 4.73 ***                            | -                |
| lmo0131                 | conserved hypothetical protein                                                 | -                                   | 2.89 ***         |
| lmo0133                 | similar to <i>E. coli</i> YjdI protein                                         | -                                   | 2.60 ***         |
| lmo0134                 | similar to <i>E. coli</i> YjdJ protein                                         | -                                   | 5.02 ***         |
| lmo0137                 | similar to oligopeptide ABC transporter, permease protein                      | -                                   | 2.11 ***         |
| lmo0193                 | unknown                                                                        | 4.22 ***                            | -                |
| lmo0194                 | ABC transporter, ATP-binding protein                                           | 4.47 ***                            | -                |
| lmo0195                 | similar to membrane protein (putative ABC transporter component)               | 4.20 ***                            | -                |
| lmo0200 ( <i>prfA</i> ) | listeriolysin positive regulatory protein                                      | -                                   | 4.60 ***         |
| lmo0249 ( <i>rplA</i> ) | ribosomal protein L1                                                           | -                                   | 2.10 ***         |
| lmo0250 ( <i>rplJ</i> ) | ribosomal protein L10                                                          | -                                   | 2.34 ***         |
| lmo0251 ( <i>rplL</i> ) | ribosomal protein L12                                                          | -                                   | 2.54 ***         |
| lmo0256                 | conserved hypothetical protein                                                 | -                                   | 2.06 ***         |
| lmo0266                 | similar to transcriptional regulators                                          | -                                   | 3.70 ***         |
| lmo0267                 | similar to other proteins                                                      | -                                   | 4.63 ***         |
| lmo0268                 | similar to phosphoglycerate mutase                                             | -                                   | 3.59 ***         |
| lmo0269                 | similar to transporter                                                         | 2.07 ***                            | -                |
| lmo0273                 | unknown                                                                        | -                                   | 2.47 ***         |
| lmo0283                 | similar to ABC transporter permease protein                                    | 2.81 ***                            | -                |
| lmo0284                 | similar to ABC transporter (ATP-binding protein)                               | 2.24 ***                            | -                |
| lmo0285                 | putative lipoprotein                                                           | 2.43 ***                            | -                |
| lmo0312                 | similar to unknown proteins                                                    | 2.11 *                              | -                |
| lmo0321                 | similar to unknown proteins                                                    | 2.49 ***                            | 4.82 ***         |
| lmo0322                 | similar to unknown proteins                                                    | 2.06 **                             | -                |
| lmo0352                 | highly similar to regulatory proteins (DeoR family)                            | 2.12 ***                            | -                |
| lmo0361                 | similar to conserved hypothetical integral membrane protein                    | 4.67 ***                            | -                |
| lmo0362                 | similar to conserved hypothetical protein                                      | 6.11 ***                            | -                |
| lmo0365                 | similar to conserved hypothetical protein                                      | 6.74 ***                            | -                |
| lmo0366                 | conserved hypothetical protein, putative lipoprotein                           | 7.20 ***                            | -                |
| lmo0367                 | conserved hypothetical protein similar to <i>B. subtilis</i> YwbN protein      | 6.08 ***                            | -                |
| lmo0377                 | unknown                                                                        | 2.05 ***                            | -                |
| lmo0391                 | unknown                                                                        | -                                   | 2.19 ***         |
| lmo0433 ( <i>inlA</i> ) | Internalin A                                                                   | -                                   | 2.05 ***         |
| lmo0484                 | unknown                                                                        | 4.37 ***                            | -                |
| lmo0485                 | unknown                                                                        | 2.48 ***                            | -                |

|                         |                                                                                           |           |          |
|-------------------------|-------------------------------------------------------------------------------------------|-----------|----------|
| lmo0515                 | conserved hypothetical protein                                                            | -         | 4.01 *** |
| lmo0518                 | similar to unknown protein                                                                | 2.76 ***  | -        |
| lmo0519                 | similar to multidrug resistance protein                                                   | 4.47 ***  | -        |
| lmo0525                 | unknown                                                                                   | 3.08 ***  | -        |
| lmo0540                 | similar to penicillin-binding protein                                                     | -         | 3.48 *** |
| lmo0541                 | similar to ABC transporter (binding protein)                                              | 13.44 *** | -        |
| lmo0553                 | unknown                                                                                   | -         | 2.28 *** |
| lmo0561                 | similar to phosphorybosil-AMP-cyclohydrolase (HisI2 protein)                              | -         | 2.94 *** |
| lmo0562                 | similar to phosphoribosyl-AMP cyclohydrolase (HisI1 protein)                              | -         | 4.71 *** |
| lmo0563                 | highly similar to cyclase HisF                                                            | -         | 3.47 *** |
| lmo0564                 | highly similar to phosphoribosylformimino-5-aminoimidazole carboxamide ribotide isomerase | -         | 3.47 *** |
| lmo0565                 | similar to amidotransferases                                                              | -         | 2.20 *** |
| lmo0570                 | similar histidinol phosphate phosphatase                                                  | -         | 2.14 *** |
| lmo0579                 | similar to unknown protein                                                                | -         | 2.32 *** |
| lmo0581                 | conserved hypothetical protein                                                            | 2.27 ***  | -        |
| lmo0590                 | similar to a fusion of two types of conserved hypothetical protein                        | 2.00 ***  | -        |
| lmo0592                 | unknown                                                                                   | 2.15 **   | -        |
| lmo0593                 | similar to transport proteins (formate)                                                   | 2.21 **   | -        |
| lmo0595                 | similar to O-acetylhomoserine sulphydrylase                                               | 2.31 ***  | -        |
| lmo0596                 | similar to unknown proteins                                                               | 2.26 **   | -        |
| lmo0597                 | similar to transcription regulator CRP/FNR family                                         | 5.18      | -        |
| lmo0599                 | conserved hypothetical protein                                                            | 2.86 ***  | -        |
| lmo0600                 | unknown                                                                                   | 2.24 ***  | -        |
| lmo0604                 | similar to <i>B. subtilis</i> YvIA protein                                                | 5.22 ***  | -        |
| lmo0609                 | similar to <i>E. coli</i> phage shock protein E                                           | -         | 2.14 *** |
| lmo0610                 | similar to internalin proteins, putative peptidoglycan bound protein (LPXTG motif)        | -         | 4.41 *** |
| lmo0617                 | unknown                                                                                   | -         | 2.14 *** |
| lmo0623                 | unknown                                                                                   | -         | 2.92 *** |
| lmo0624                 | similar to unknown proteins                                                               | 2.16 ***  | 3.42 *** |
| lmo0625                 | unknown                                                                                   | -         | 7.19 *** |
| lmo0626                 | similar to unknown protein                                                                | -         | 2.85 *** |
| lmo0656                 | conserved hypothetical protein                                                            | 2.30 ***  | -        |
| lmo0661                 | similar to unknown proteins                                                               | -         | 2.28 *** |
| lmo0665                 | unknown                                                                                   | 2.02 ***  | -        |
| lmo0666                 | similar to unknown protein                                                                | 2.98 ***  | -        |
| lmo0669                 | similar to oxidoreductase                                                                 | -         | 2.04 *** |
| lmo0672                 | similar to unknown protein                                                                | 2.64 ***  | -        |
| lmo0680                 | similar to flagella-associated protein flhA                                               | 2.22 ***  | -        |
| lmo0681                 | similar to flagellar biosynthesis protein FlhF                                            | 2.20 **   | -        |
| lmo0683                 | similar to chemotactic methyltransferase CheR                                             | 2.37 **   | -        |
| lmo0684                 | unknown                                                                                   | 2.24 **   | -        |
| lmo0685                 | similar to motility protein (flagellar motor rotation) MotA                               | 2.51 **   | -        |
| lmo0686 ( <i>motB</i> ) | similar to motility protein (flagellar motor rotation) MotB                               | 2.17 ***  | -        |
| lmo0687                 | unknown                                                                                   | 2.69 ***  | -        |
| lmo0688                 | similar to unknown protein                                                                | 2.43 ***  | -        |
| lmo0689                 | similar to CheA activity-modulating chemotaxis protein CheV                               | 2.49 ***  | -        |
| lmo0734                 | similar to transcriptional regulator (LacI family)                                        | 2.34 ***  | -        |
| lmo0753                 | similar to transcription regulator Crp/Fnr family                                         | -         | 3.05 *** |
| lmo0754                 | weakly similar to a bile acid 7-alpha dehydratase                                         | -         | 4.37 *** |
| lmo0757                 | similar to hypothetical proteins                                                          | -         | 2.37 *** |
| lmo0759                 | unknown                                                                                   | -         | 2.97 *** |
| lmo0760                 | unknown                                                                                   | -         | 2.53 *** |
| lmo0778                 | unknown                                                                                   | 2.92 ***  | -        |
| lmo0780                 | unknown                                                                                   | 2.68 ***  | -        |
| lmo0781                 | similar to mannose-specific phosphotransferase system (PTS) component IID                 | -         | 4.26 *** |
| lmo0782                 | similar to mannose-specific phosphotransferase system (PTS) component IIC                 | -         | 2.79 *** |

|                         |                                                                                      |           |          |
|-------------------------|--------------------------------------------------------------------------------------|-----------|----------|
| lmo0783                 | similar to mannose-specific phosphotransferase system (PTS) component IIB            | -         | 5.29 *** |
| lmo0784                 | similar to mannose-specific phosphotransferase system (PTS) component IIA            | -         | 4.63 *** |
| lmo0795                 | conserved hypothetical protein                                                       | 2.22 ***  | -        |
| lmo0799                 | unknown                                                                              | 2.41 ***  | -        |
| lmo0800                 | similar to <i>B. subtilis</i> YqkB protein                                           | -         | 5.35 *** |
| lmo0806                 | similar to transcription regulator                                                   | 2.89 **   | -        |
| lmo0808                 | similar to spermidine/putrescine ABC transporter, permease protein                   | 2.42 **   | -        |
| lmo0809                 | similar to spermidine/putrescine ABC transporter, permease protein                   | 2.25 ***  | -        |
| lmo0810                 | similar to spermidine/putrescine-binding protein                                     | 2.17 ***  | -        |
| lmo0811                 | similar to carbonic anhydrase                                                        | 2.32 ***  | -        |
| lmo0818                 | similar to cation transporting ATPase                                                | 2.17 ***  | -        |
| lmo0823                 | similar to oxydoreductases                                                           | -         | 3.82 *** |
| lmo0830 ( <i>fbp</i> )  | highly similar to fructose-1,6-bisphosphatase                                        | 2.30 **   | -        |
| lmo0835                 | putative peptidoglycan bound protein (LPXTG motif)                                   | 2.37 *    | -        |
| lmo0836                 | similar to <i>B. subtilis</i> YrkR protein                                           | 2.56 ***  | -        |
| lmo0843                 | similar to <i>B. subtilis</i> protein YsdA                                           | -         | 2.46 *** |
| lmo0844                 | conserved hypothetical protein                                                       | 3.61 ***  | -        |
| lmo0850                 | hypothetical protein                                                                 | 2.57 ***  | 3.68 *** |
| lmo0851                 | unknown                                                                              | -         | 2.10 *** |
| lmo0867                 | unknown                                                                              | 3.08 ***  | -        |
| lmo0869                 | unknown                                                                              | 2.00 **   | -        |
| lmo0873                 | Similar to transcriptional regulator (antiterminator)                                | -         | 2.03 *** |
| lmo0875                 | similar to PTS system, beta-glucoside enzyme IIB component                           | -         | 2.03 *** |
| lmo0894 ( <i>rsbW</i> ) | sigma-B activity negative regulator RsbW                                             | -         | 2.07 *** |
| lmo0903                 | conserved hypothetical protein                                                       | 4.50 ***  | -        |
| lmo0905                 | unknown                                                                              | 2.10 ***  | 3.08 *** |
| lmo0906                 | similar to glutathione Reductase                                                     | -         | 3.75 *** |
| lmo0907                 | similar to phosphoglycerate mutase                                                   | -         | 2.06 *** |
| lmo0910                 | unknown                                                                              | -         | 2.22 *** |
| lmo0911                 | unknown                                                                              | -         | 2.25 *** |
| lmo0912                 | similar to transporters (formate)                                                    | -         | 3.76 *** |
| lmo0913                 | similar to succinate semialdehyde dehydrogenase                                      | -         | 2.70 *** |
| lmo0915                 | similar to phosphotransferase system enzyme IIC                                      | -         | 2.06 *** |
| lmo0937                 | unknown                                                                              | -         | 2.21 *** |
| lmo0939                 | unknown                                                                              | -         | 2.47 *** |
| lmo0944                 | similar to <i>B. subtilis</i> YneR protein                                           | 2.04 ***  | -        |
| lmo0945                 | similar to C-terminal part of <i>B. subtilis</i> ComEC protein and to ComEA          | -         | 2.51 *** |
| lmo0954                 | unknown                                                                              | -         | 3.66 *** |
| lmo0955                 | unknown                                                                              | -         | 2.13 *** |
| lmo0994                 | unknown                                                                              | -         | 2.48 *** |
| lmo1000                 | similar to phytoene dehydrogenase                                                    | 2.30 ***  | -        |
| lmo1001                 | similar to <i>B. subtilis</i> protein YkvS                                           | 4.41 ***  | -        |
| lmo1007                 | unknown                                                                              | 18.96 *** | -        |
| lmo1015 ( <i>gbuB</i> ) | highly similar to glycine betaine ABC transporters (permease)                        | 4.27 ***  | -        |
| lmo1016 ( <i>gbuC</i> ) | highly similar to glycine betaine ABC transporters (glycine betaine-binding protein) | 3.85 ***  | -        |
| lmo1023                 | similar to a bacterial K(+)-uptake system                                            | -         | 2.31 *** |
| lmo1056                 | unknown                                                                              | 2.02 ***  | -        |
| lmo1064                 | similar to membrane and transport proteins                                           | 2.35 ***  | -        |
| lmo1069                 | similar to <i>B. subtilis</i> Ylal protein                                           | -         | 2.93 *** |
| lmo1091                 | similar to glycosyltransferases                                                      | -         | 2.39 *** |
| lmo1112                 | highly similar to TN916 ORF21                                                        | 4.34 *    | -        |
| lmo1131                 | similar to ABC transporters, ATP-binding proteins                                    | 2.20 *    | -        |
| lmo1132                 | similar to ABC transporters, ATP-binding proteins                                    | 4.37 ***  | -        |
| lmo1137                 | unknown                                                                              | 5.23 **   | -        |
| lmo1145                 | similar to <i>Salmonella enterica</i> PduV protein                                   | 2.23 **   | -        |
| lmo1151                 | similar to <i>Salmonella</i> Typhimurium PduA protein                                | -         | 2.38 *** |
| lmo1172                 | similar to similar to two-component response regulator                               | 2.22 ***  | 3.84 *** |
| lmo1173                 | similar to two-component sensor histidine kinase                                     | 2.13 **   | 3.75 *** |

|                          |                                                                                    |          |          |
|--------------------------|------------------------------------------------------------------------------------|----------|----------|
| lmo1175 ( <i>eutB</i> )  | similar to ethanolamine ammonia-lyase, heavy chain                                 | -        | 2.18 *** |
| lmo1176 ( <i>eutC</i> )  | similar to ethanolamine ammonia-lyase, light chain                                 | -        | 2.39 *** |
| lmo1177                  | similar to putative carboxysome structural protein ( <i>eutL</i> )                 | 3.23 *** | -        |
| lmo1179                  | similar to acetaldehyde dehydrogenase / alcohol dehydrogenase                      | -        | 4.19 *** |
| lmo1180                  | similar to putative carboxysome structural protein                                 | -        | 3.90 *** |
| lmo1181                  | similar to cobalamin adenosyl transferase                                          | 5.08 **  | 2.10 **  |
| lmo1182                  | similar to <i>Salmonella enterica</i> PduL protein                                 | 5.82 **  | 2.38 **  |
| lmo1183                  | unknown                                                                            | 9.23 *** | 2.10 **  |
| lmo1184                  | similar to carbon dioxide concentrating mechanism protein                          | 6.31 **  | 3.17 **  |
| lmo1185                  | similar to <i>Salmonella enterica</i> PduT protein                                 | 5.68 *** | -        |
| lmo1186                  | similar to ethanolamine utilization protein EutH - <i>E. coli</i>                  | 2.70 **  | 2.02 **  |
| lmo1231                  | similar to DNA polymerase beta, to <i>B. subtilis</i> YshC protein                 | -        | 2.38 *** |
| lmo1232                  | similar to MutS protein (MutS2)                                                    | -        | 2.17 *** |
| lmo1245                  | unknown                                                                            | 7.80 *** | -        |
| lmo1246                  | similar to ATP-dependent RNA helicase (DEAD motif)                                 | 2.27 *** | -        |
| lmo1249                  | unknown                                                                            | 2.65 *   | -        |
| lmo1252                  | similar to <i>B. subtilis</i> YxkD protein                                         | 3.15 *** | -        |
| lmo1257                  | unknown                                                                            | -        | 2.11 *** |
| lmo1340                  | similar to <i>B. subtilis</i> YqgU protein                                         | -        | 7.34 *** |
| lmo1428 ( <i>opuCA</i> ) | similar to glycine betaine/carnitine/choline ABC transporter (ATP-binding protein) | 2.16 *** | -        |
| lmo1431                  | similar to ABC transporter (ATP-binding protein)                                   | 2.15 *** | -        |
| lmo1450                  | similar to ATP-dependent RNA helicase, DEAD-box family ( <i>deaD</i> )             | 2.03 *** | -        |
| lmo1479 ( <i>lepA</i> )  | highly similar to GTP-binding protein <i>LepA</i>                                  | 2.39 *** | -        |
| lmo1485                  | similar to unknown proteins                                                        | 2.05 *** | -        |
| lmo1486                  | unknown                                                                            | 2.02 **  | -        |
| lmo1498                  | similar to O-methyltransferase                                                     | -        | 2.28 *   |
| lmo1499                  | similar to unknown proteins                                                        | -        | 3.89 **  |
| lmo1512                  | similar to putative tRNA (5-methylaminomethyl-2-thiouridylate)-methyltransferase   | -        | 2.28 *** |
| lmo1513                  | similar to iron-sulfur cofactor synthesis protein                                  | -        | 2.54 *** |
| lmo1518                  | unknown                                                                            | -        | 2.37 *** |
| lmo1519 ( <i>aspS</i> )  | aspartyl-tRNA synthetase                                                           | -        | 3.78 *** |
| lmo1526                  | similar to unknown proteins                                                        | 2.62 *** | -        |
| lmo1537                  | conserved GTP binding protein                                                      | 2.01 *** | -        |
| lmo1558                  | similar to hypothetical GTP binding protein                                        | 2.02 **  | -        |
| lmo1567 ( <i>citZ</i> )  | highly similar to citrate synthase subunit II                                      | 2.15 *** | -        |
| lmo1568                  | similar to unknown proteins                                                        | 2.08 *** | -        |
| lmo1583                  | similar to thiol peroxidases                                                       | 2.14 *** | -        |
| lmo1617                  | similar to multidrug-efflux transporter                                            | 2.98 *** | -        |
| lmo1618                  | similar to transcription regulator MarR family                                     | 2.32 **  | -        |
| lmo1649                  | unknown                                                                            | -        | 2.44 *** |
| lmo1650                  | similar to hypothetical proteins                                                   | -        | 2.50 *** |
| lmo1690                  | similar to hypothetical proteins                                                   | -        | 2.19 *** |
| lmo1692                  | unknown                                                                            | -        | 2.66 *** |
| lmo1713                  | similar to cell-shape determining proteins                                         | 2.31 *** | -        |
| lmo1722                  | similar to ATP-dependent RNA helicases                                             | 2.24 *** | 2.46 *** |
| lmo1762                  | unknown                                                                            | 2.71 *** | -        |
| lmo1791                  | unknown                                                                            | -        | 2.79 *** |
| lmo1826                  | unknown                                                                            | 2.07 *** | -        |
| lmo1828                  | similar to conserved hypothetical protein                                          | 2.06 *** | -        |
| lmo1829                  | similar to fibronectin binding proteins                                            | 2.23 *** | -        |
| lmo1832 ( <i>pyrF</i> )  | highly similar to orotidine 5-phosphate decarboxylases                             | -        | 2.55 **  |
| lmo1835 ( <i>pyrAB</i> ) | highly similar to carbamoyl-phosphate synthetase (catalytic subunit)               | 2.17 **  | -        |
| lmo1836 ( <i>pyrAa</i> ) | highly similar to carbamoyl-phosphate synthetase (glutaminase subunit)             | 2.39 **  | -        |
| lmo1838 ( <i>pyrB</i> )  | highly similar to aspartate carbamoyltransferase                                   | 2.36 **  | -        |
| lmo1840 ( <i>pyrR</i> )  | highly similar to pyrimidine operon regulatory protein                             | 2.28 **  | -        |

|                         |                                                                               |          |          |
|-------------------------|-------------------------------------------------------------------------------|----------|----------|
| lmo1843                 | similar to conserved hypothetical proteins                                    | 2.66 *** | -        |
| lmo1844 ( <i>lsp</i> )  | highly similar to signal peptidase II                                         | 2.30 *** | -        |
| lmo1845                 | similar to conserved hypothetical proteins                                    | -        | 4.95 *** |
| lmo1864                 | similar to hemolysinIII proteins, putative integral membrane protein          | 2.76 *** | 3.29 *** |
| lmo1865                 | similar to conserved hypothetical proteins                                    | 2.41 *** | -        |
| lmo1868                 | similar to conserved hypothetical proteins                                    | -        | 2.74 *** |
| lmo1870                 | similar to alkaline phosphatase                                               | 2.80 *** | -        |
| lmo1887                 | similar to conserved hypothetical proteins                                    | 2.09 *** | -        |
| lmo1891 ( <i>recU</i> ) | similar to DNA repair and homologous recombination protein                    | 2.31 *** | -        |
| lmo1936 ( <i>gpsA</i> ) | similar to NAD(P)H-dependent glycerol-3-phosphate dehydrogenase               | 2.23 **  | 2.64 *** |
| lmo1937                 | similar to unknown protein                                                    | 2.24 **  | -        |
| lmo1951                 | similar to unknown proteins                                                   | -        | 2.22 *** |
| lmo1957 ( <i>fhuG</i> ) | similar to ferrichrome ABC transporter (permease)                             | 2.29 *** | -        |
| lmo1958 ( <i>fhuB</i> ) | similar to ferrichrome ABC transporter (permease)                             | 3.11 *** | -        |
| lmo1960 ( <i>fhuC</i> ) | similar to ferrichrome ABC transporter (ATP-binding protein)                  | 3.84 *** | -        |
| lmo1961                 | similar to oxidoreductases                                                    | 2.25 *** | -        |
| lmo1962                 | similar to transcription regulators (TetR family)                             | -        | 2.49 *** |
| lmo1963                 | similar to unknown proteins                                                   | -        | 2.78 *** |
| lmo1964                 | similar to ABC transporter, ATP-binding protein                               | -        | 2.68 *** |
| lmo1972                 | similar to pentitol PTS system enzyme II B component                          | -        | 2.50 *** |
| lmo1978                 | similar to glucose-6-phosphate 1-dehydrogenase                                | -        | 4.19 *** |
| lmo1984 ( <i>ilvB</i> ) | similar to acetolactate synthase (acetohydroxy-acid synthase) (large subunit) | 2.02 **  | -        |
| lmo1985 ( <i>ilvN</i> ) | similar to acetolactate synthase (acetohydroxy-acid synthase) (small subunit) | 3.13 *** | -        |
| lmo1986 ( <i>ilvC</i> ) | similar to ketol-acid reductoisomerase (acetohydroxy-acid isomeroreductase)   | 2.63 **  | -        |
| lmo1988 ( <i>leuB</i> ) | similar to 3-isopropylmalate dehydrogenase                                    | 2.69 *   | -        |
| lmo1990 ( <i>leuD</i> ) | similar to 3-isopropylmalate dehydratase (small subunit)                      | 2.31 *   | -        |
| lmo1991 ( <i>ilvA</i> ) | similar to threonine dehydratase                                              | 2.31 **  | -        |
| lmo1992                 | similar to alpha-acetolactate decarboxylase                                   | 4.22 *** | 5.73 *** |
| lmo1997                 | similar to PTS mannose-specific enzyme IIA component                          | -        | 3.42 *** |
| lmo1998                 | similar to opine catabolism protein                                           | -        | 2.20 *** |
| lmo2006 ( <i>alsS</i> ) | similar to alpha-acetolactate synthase protein, AlsS                          | 3.20 *** | -        |
| lmo2057 ( <i>ctaB</i> ) | highly similar to heme A farnesyltransferase                                  | 2.17 *** | -        |
| lmo2058 ( <i>ctaA</i> ) | similar to heme O oxygenase                                                   | 2.23 *** | -        |
| lmo2065                 | unknown                                                                       | 2.31 *** | -        |
| lmo2071                 | unknown                                                                       | 2.22 *** | -        |
| lmo2087                 | similar to unknown proteins                                                   | 2.26 *** | -        |
| lmo2114                 | similar to ABC transporter (ATP-binding protein)                              | 2.06 *** | -        |
| lmo2181                 | similar to unknown protein                                                    | 2.73 **  | -        |
| lmo2185                 | unknown                                                                       | 4.63 *** | -        |
| lmo2186                 | unknown                                                                       | 8.36 *** | -        |
| lmo2191                 | similar to unknown proteins                                                   | 2.46 *** | -        |
| lmo2197                 | unknown                                                                       | 2.16 *** | -        |
| lmo2199                 | similar to unknown protein                                                    | 5.95 *** | -        |
| lmo2200                 | similar to transcription regulator                                            | 7.03 *** | -        |
| lmo2210                 | unknown                                                                       | 5.07 *** | -        |
| lmo2220                 | similar to S. aureus Cbf1 protein                                             | -        | 2.08 *** |
| lmo2232                 | similar to unknown proteins                                                   | -        | 2.69 *** |
| lmo2256                 | similar to unknown proteins                                                   | -        | 5.75 *** |
| lmo2258                 | unknown                                                                       | 2.05 **  | -        |
| lmo2263                 | similar to unknown proteins                                                   | -        | 2.03 *** |
| lmo2269                 | unknown                                                                       | -        | 8.56 *** |
| lmo2289                 | Protein gp14 [Bacteriophage A118]                                             | -        | 2.19 *** |
| lmo2291                 | major tail shaft protein [Bacteriophage A118]                                 | 2.62 **  | -        |
| lmo2292                 | Protein gp11 [Bacteriophage A118]                                             | 2.10 *   | -        |
| lmo2301                 | similar to putative terminase small subunit from Bacteriophage A118           | -        | 2.21 *** |
| lmo2303                 | Protein gp66 [Bacteriophage A118]                                             | 2.33 **  | -        |

|                         |                                                                                            |           |          |
|-------------------------|--------------------------------------------------------------------------------------------|-----------|----------|
| lmo2304                 | Bacteriophage A118 gp65 protein                                                            | 2.34 **   | -        |
| lmo2323                 | gp43 [Bacteriophage A118]                                                                  | 6.68 **   | -        |
| lmo2324                 | similar to anti-repressor [Bacteriophage A118]                                             | 2.69 *    | -        |
| lmo2335 ( <i>fruA</i> ) | highly similar to phosphotransferase system (PTS) fructose-specific enzyme IIABC component | 12.35 **  | -        |
| lmo2336 ( <i>fruB</i> ) | fructose-1-phosphate kinase                                                                | 21.42 *** | -        |
| lmo2337                 | similar to regulatory protein DeoR family                                                  | 20.71 *** | -        |
| lmo2338 ( <i>pepC</i> ) | aminopeptidase C                                                                           | -         | 3.20 *** |
| lmo2345                 | conserved hypothetical protein                                                             | 2.36 **   | -        |
| lmo2347                 | similar to amino acid ABC transporter (permease)                                           | 2.64 **   | -        |
| lmo2348                 | similar to amino acid ABC-transporter (permease)                                           | 2.32 ***  | -        |
| lmo2349                 | similar to amino acid ABC transporter (binding protein)                                    | 3.58 ***  | -        |
| lmo2350                 | similar to <i>B. subtilis</i> YtmI protein                                                 | 2.09 **   | -        |
| lmo2352                 | similar to LysR family transcription regulator                                             | 4.04 ***  | -        |
| lmo2357                 | similar to unknown protein                                                                 | -         | 2.14 *** |
| lmo2358                 | similar to N-acetylglucosamine-6-phosphate isomerase                                       | -         | 2.62 *** |
| lmo2360                 | transmembrane protein                                                                      | 3.47 ***  | -        |
| lmo2361                 | conserved hypothetical protein                                                             | 3.01 ***  | -        |
| lmo2372                 | similar to ABC-transporter ATP binding proteins                                            | 2.36 ***  | -        |
| lmo2375                 | unknown                                                                                    | 3.70 ***  | -        |
| lmo2378                 | similar to proteins involved in resistance to cholate and to NA(+) and in pH homeostasis   | 2.40 ***  | -        |
| lmo2379                 | similar to proteins involved in resistance to cholate and to NA(+) and in pH homeostasis   | 2.17 ***  | -        |
| lmo2380                 | similar to proteins involved in resistance to cholate and to NA(+) and in pH homeostasis   | 2.14 ***  | -        |
| lmo2409                 | unknown                                                                                    | 2.05 ***  | -        |
| lmo2432                 | unknown                                                                                    | -         | 2.25 *** |
| lmo2454                 | unknown                                                                                    | -         | 3.56 *** |
| lmo2462                 | similar to dipeptidases                                                                    | -         | 2.68 *** |
| lmo2463                 | similar to transport protein                                                               | -         | 2.18 *** |
| lmo2468 ( <i>clpP</i> ) | ATP-dependent Clp protease proteolytic subunit                                             | 2.87 ***  | -        |
| lmo2480                 | similar to acetyltransferase                                                               | 2.00 ***  | -        |
| lmo2486                 | unknown                                                                                    | 3.06 *    | -        |
| lmo2487                 | similar to <i>B. subtilis</i> YvlB protein                                                 | 3.03 ***  | 4.71 *** |
| lmo2494                 | similar to negative regulator of phosphate regulon                                         | 3.05 ***  | -        |
| lmo2495                 | similar to phosphate ABC transporter (ATP-binding protein)                                 | 4.10 ***  | -        |
| lmo2498                 | similar to phosphate ABC transporter (permease protein)                                    | 2.63 *    | -        |
| lmo2522                 | similar to hypothetical cell wall binding protein from <i>B. subtilis</i>                  | -         | 2.31 *** |
| lmo2535 ( <i>atpB</i> ) | highly similar to H <sup>+</sup> -transporting ATP synthase chain a                        | -         | 2.11 *** |
| lmo2557                 | conserved hypothetical protein                                                             | 2.54 ***  | -        |
| lmo2567                 | unknown                                                                                    | 4.57 ***  | -        |
| lmo2568                 | unknown                                                                                    | 3.02 **   | -        |
| lmo2569                 | similar to dipeptide ABC transporter (dipeptide-binding protein)                           | 2.60 ***  | -        |
| lmo2588                 | similar to drug-export proteins                                                            | 2.23 **   | -        |
| lmo2602                 | conserved hypothetical protein                                                             | -         | 2.87 *** |
| lmo2603                 | unknown                                                                                    | -         | 2.28 *** |
| lmo2613 ( <i>rplO</i> ) | ribosomal protein L15                                                                      | -         | 2.41 *** |
| lmo2614 ( <i>rpmD</i> ) | ribosomal protein L30                                                                      | -         | 2.92 *** |
| lmo2615 ( <i>rpsE</i> ) | ribosomal protein S5                                                                       | -         | 3.08 *** |
| lmo2616 ( <i>rplR</i> ) | ribosomal protein L18                                                                      | -         | 3.09 *** |
| lmo2617 ( <i>rplF</i> ) | ribosomal protein L6                                                                       | -         | 2.88 *** |
| lmo2618 ( <i>rpsH</i> ) | ribosomal protein S8                                                                       | -         | 3.09 *** |
| lmo2619 ( <i>rpsN</i> ) | ribosomal protein S14                                                                      | -         | 3.10 *** |
| lmo2620 ( <i>rplE</i> ) | ribosomal protein L5                                                                       | -         | 3.14 *** |
| lmo2621 ( <i>rplX</i> ) | ribosomal protein L24                                                                      | -         | 2.73 *** |
| lmo2622 ( <i>rplN</i> ) | ribosomal protein L14                                                                      | -         | 2.81 *** |
| lmo2623 ( <i>rpsQ</i> ) | ribosomal protein S17                                                                      | -         | 2.27 *** |
| lmo2624 ( <i>rpmC</i> ) | ribosomal protein L29                                                                      | -         | 2.42 *** |
| lmo2625 ( <i>rplP</i> ) | ribosomal protein L16                                                                      | -         | 2.06 *** |
| lmo2626 ( <i>rpsC</i> ) | ribosomal protein S3                                                                       | -         | 2.03 *** |
| lmo2628 ( <i>rplY</i> ) | ribosomal protein S19                                                                      | -         | 2.01 *** |

|                         |                                                                    |          |          |
|-------------------------|--------------------------------------------------------------------|----------|----------|
| lmo2648                 | similar to Phosphotriesterase                                      | -        | 2.34 *** |
| lmo2649                 | similar to hypothetical PTS enzyme IIC component                   | -        | 2.33 *** |
| lmo2650                 | similar to hypothetical PTS enzyme IIB component                   | -        | 2.52 *** |
| lmo2669                 | unknown                                                            | -        | 4.25 *** |
| lmo2673                 | conserved hypothetical protein                                     | -        | 2.72 *** |
| lmo2674                 | similar to ribose 5-phosphate epimerase                            | -        | 4.30 *** |
| lmo2683                 | similar to cellobiose phosphotransferase enzyme IIB component      | 2.22 **  | -        |
| lmo2689                 | highly similar to Mg <sup>2+</sup> transport ATPase                | 2.15 *** | -        |
| lmo2694                 | similar to lysine decarboxylase                                    | -        | 2.35 *** |
| lmo2745                 | similar to ABC transporter (ATP-binding protein)                   | -        | 2.10 *** |
| lmo2761                 | similar to beta-glucosidase                                        | 2.18 **  | -        |
| lmo2766                 | similar to hypothetical transcriptional regulator                  | 3.01 *** | -        |
| lmo2784                 | similar to lichenan operon transcription antiterminator licR       | -        | 2.45 *** |
| lmo2786 ( <i>bvrC</i> ) | bvrC                                                               | -        | 5.27 *** |
| lmo2787 ( <i>bvrB</i> ) | beta-glucoside-specific phosphotransferase enzyme II ABC component | -        | 2.74 **  |
| lmo2811                 | similar to GTPase                                                  | 2.28 *** | -        |
| lmo2830                 | similar to thioredoxin                                             | -        | 5.56 *** |
| lmo2852                 | unknown                                                            | 4.15 *** | -        |

<sup>a</sup>Genes were considered to be up-regulated at 7°C if the fold change compared to 37°C was  $\geq 2.0$  with an adjusted p-value  $\leq 0.05$

<sup>b</sup>Gene names are from ListiList (<http://genolist.pasteur.fr/ListiList>). Predicted operons are boxed. Operon predictions are from ListiList and Toledo-Arana et al., Nature 459:950-956, 2009.

<sup>c</sup>gene functions were based on annotation provided by ListiList

<sup>d</sup>Superscripts are adjusted p values: "\*\*\*\*" (< 0.001), "\*\*\*" (< 0.01), "\*\*" ( $\leq 0.05$ )
