# Supplementary material
Source: PubMed Central journal article supplement (PMC3346412)
Supplement: supp_78.11.3824_AEM-AEM00051-12-s02.pdf [file supp_78.11.3824_AEM-AEM00051-12-s02.pdf]

Table S2. *Listeria monocytogenes* genes transcribed at lower levels<sup>a</sup> at 7°C compared to 37°C

| Name <sup>b</sup>       | Gene Function <sup>c</sup>                                                         | Fold change <sup>d</sup> (7°C/37°C) |                  |
|-------------------------|------------------------------------------------------------------------------------|-------------------------------------|------------------|
|                         |                                                                                    | Log phase                           | Stationary phase |
| lmo0013 ( <i>qoxA</i> ) | AA3-600 quinol oxidase subunit II                                                  | -                                   | -2.04 ***        |
| lmo0014 ( <i>qoxB</i> ) | AA3-600 quinol oxidase subunit I                                                   | -                                   | -2.05 ***        |
| lmo0018                 | beta-glucosidase                                                                   | -2.84 **                            | -                |
| lmo0021                 | similar to PTS system, fructose-specific IIA component                             | -2.14 **                            | -                |
| lmo0022                 | similar to PTS system, fructose-specific IIB component                             | -4.39 *                             | -                |
| lmo0024                 | similar to PTS system, mannose-specific IID component                              | -4.76 **                            | -                |
| lmo0027                 | similar to PTS system, beta-glucosides specific enzyme IABC                        | -6.84 *                             | -                |
| lmo0044 ( <i>rpsF</i> ) | ribosomal protein S6                                                               | -                                   | -3.07 ***        |
| lmo0045 ( <i>ssb</i> )  | highly similar to single-strand binding protein (SSB)                              | -                                   | -3.99 ***        |
| lmo0046 ( <i>rpsR</i> ) | ribosomal protein S18                                                              | -                                   | -4.16 ***        |
| lmo0053 ( <i>rplI</i> ) | 50S ribosomal protein L9                                                           | -                                   | -2.44 ***        |
| lmo0101                 | similar to transcription regulator                                                 | -                                   | -2.02 ***        |
| lmo0104                 | unknown                                                                            | -2.12 ***                           | -                |
| lmo0109                 | similar to transcriptional regulatory proteins, AraC family                        | -4.35 **                            | -2.65 ***        |
| lmo0110                 | similar to lipase                                                                  | -5.17 **                            | -                |
| lmo0180                 | similar to sugar ABC transporter, permease protein                                 | -2.39 **                            | -                |
| lmo0181                 | similar to sugar ABC transporter, sugar-binding protein                            | -3.50 **                            | -                |
| lmo0183                 | similar to alpha-glucosidase                                                       | -3.64 **                            | -                |
| lmo0184                 | similar to oligo-1,6-glucosidase                                                   | -3.11 **                            | -                |
| lmo0196                 | similar to <i>B. subtilis</i> SpoVG protein                                        | -                                   | -3.29 ***        |
| lmo0197                 | similar to <i>B. subtilis</i> SpoVG protein                                        | -                                   | -2.24 ***        |
| lmo0201 ( <i>plcA</i> ) | phosphatidylinositol-specific phospholipase c                                      | -2.72 ***                           | -                |
| lmo0202 ( <i>hly</i> )  | listeriolysin O precursor                                                          | -14.43 ***                          | -3.80 ***        |
| lmo0204 ( <i>actA</i> ) | actin-assembly inducing protein precursor                                          | -2.38 **                            | -                |
| lmo0205 ( <i>plcB</i> ) | phospholipase C                                                                    | -3.12 ***                           | -                |
| lmo0208                 | conserved hypothetical protein                                                     | -2.45 ***                           | -                |
| lmo0217                 | similar to <i>B. subtilis</i> DivIC protein                                        | -                                   | -2.03 ***        |
| lmo0238 ( <i>cysE</i> ) | similar to serine O-acetyltransferase                                              | -2.65 ***                           | -2.23 ***        |
| lmo0239 ( <i>cysS</i> ) | cysteinyI-tRNA synthetase                                                          | -3.24 ***                           | -3.23 ***        |
| lmo0240                 | highly similar to <i>B. subtilis</i> YazC protein                                  | -3.21 ***                           | -3.20 ***        |
| lmo0241                 | similar to conserved hypothetical proteins like to <i>B. subtilis</i> YacO protein | -3.35 ***                           | -                |
| lmo0242                 | similar to <i>B. subtilis</i> Yacp protein                                         | -3.61 ***                           | -2.06 ***        |
| lmo0243 ( <i>sigH</i> ) | RNA polymerase sigma-30 factor (sigma-H)                                           | -2.78 ***                           | -                |
| lmo0244                 | similar to ribosomal protein L33 type II                                           | -                                   | -2.03 ***        |
| lmo0245 ( <i>secE</i> ) | highly similar to preprotein translocase subunit                                   | -                                   | -2.15 ***        |
| lmo0258 ( <i>rpoB</i> ) | RNA polymerase (beta subunit)                                                      | -                                   | -3.57 ***        |
| lmo0259 ( <i>rpoC</i> ) | RNA polymerase (beta subunit)                                                      | -                                   | -2.66 ***        |
| lmo0291                 | conserved hypothetical protein similar to <i>B. subtilis</i> YycJ protein          | -                                   | -2.38 ***        |
| lmo0295                 | similar to FMN-containing NADPH-linked nitro/flavin reductase                      | -2.93 *                             | -                |
| lmo0298                 | similar to PTS beta-glucoside-specific enzyme IIC component                        | -4.38 *                             | -                |
| lmo0299                 | similar to PTS beta-glucoside-specific enzyme IIB component                        | -9.09 *                             | -                |
| lmo0300                 | similar to phospho-beta-glucosidase and phospho-beta-galactosidase                 | -6.81 *                             | -                |

|         |                                                                                          |            |           |
|---------|------------------------------------------------------------------------------------------|------------|-----------|
| lmo0301 | similar to PTS beta-glucoside-specific enzyme IIA component                              | -2.06 **   | -         |
| lmo0307 | unknown                                                                                  | -2.76 ***  | -         |
| lmo0319 | similar to phospho-beta-glucosidase                                                      | -4.41 **   | -         |
| lmo0323 | similar to unknown proteins                                                              | -2.05 *    | -         |
| lmo0342 | similar to transketolase                                                                 | -2.16 *    | -         |
| lmo0343 | similar to transaldolase                                                                 | -3.20 *    | -         |
| lmo0345 | similar to sugar-phosphate isomerase                                                     | -2.90 *    | -2.17 **  |
| lmo0346 | similar to triosephosphate isomerase                                                     | -3.69 **   | -         |
| lmo0347 | similar to dihydroxyacetone kinase                                                       | -2.10 *    | -2.68 **  |
| lmo0348 | similar to dihydroxyacetone kinase                                                       | -          | -2.37 *** |
| lmo0349 | unknown                                                                                  | -          | -4.05 **  |
| lmo0351 | similar to unknown proteins                                                              | -          | -4.17 **  |
| lmo0354 | similar to fatty-acid--CoA ligase                                                        | -3.09 ***  | -         |
| lmo0355 | similar to Flavocytochrome C Fumarate Reductase chain A                                  | -10.10 *** | -         |
| lmo0386 | similar to <i>B. subtilis</i> IolD protein, to acetolactate synthase                     | -2.73 *    | -         |
| lmo0387 | similar to <i>B. subtilis</i> YhdG protein                                               | -          | -2.20 *** |
| lmo0388 | unknown                                                                                  | -          | -2.06 *** |
| lmo0398 | similar to phosphotransferase system enzyme IIA                                          | -9.25 *    | -         |
| lmo0399 | similar to fructose-specific phosphotransferase enzyme IIB                               | -3.22 *    | -         |
| lmo0400 | similar to fructose-specific phosphotransferase enzyme IIC                               | -15.17 *   | -         |
| lmo0401 | highly similar to <i>E. coli</i> YbgG protein, a putative sugar hydrolase                | -4.82 *    | -         |
| lmo0402 | similar to transcriptional antiterminator (BglG family)                                  | -3.69 *    | -         |
| lmo0408 | unknown                                                                                  | -          | -2.58 *** |
| lmo0424 | similar to <i>Staphylococcus xylosus</i> glucose uptake protein                          | -4.27 *    | -         |
| lmo0425 | similar to transcription antiterminator BglG family                                      | -15.82 **  | -         |
| lmo0426 | similar to PTS fructose-specific enzyme IIA component                                    | -25.39 **  | -         |
| lmo0427 | similar to PTS fructose-specific enzyme IIB component                                    | -19.37 **  | -         |
| lmo0428 | similar to PTS fructose-specific enzyme IIC component                                    | -12.30 **  | -         |
| lmo0429 | similar to sugar hydrolase                                                               | -9.76 **   | -         |
| lmo0431 | similar to acetyltransferase                                                             | -2.08 **   | -         |
| lmo0443 | similar to <i>B. subtilis</i> transcription regulator LytR                               | -          | -5.31 *** |
| lmo0471 | unknown                                                                                  | -5.30 *    | -         |
| lmo0472 | unknown                                                                                  | -13.43 *   | -         |
| lmo0493 | similar to acylase                                                                       | -2.03 **   | -         |
| lmo0517 | similar to phosphoglycerate mutase                                                       | -4.54 *    | -         |
| lmo0536 | similar to 6-phospho-beta-glucosidase                                                    | -2.67 **   | -         |
| lmo0539 | similar to tagatose-1,6-diphosphate aldolase                                             | -          | -4.57 *** |
| lmo0593 | similar to transport proteins                                                            | -          | -3.05 *** |
| lmo0636 | similar to unknown proteins                                                              | -2.21 ***  | -         |
| lmo0641 | similar to heavy metal-transporting ATPase                                               | -2.95 **   | -         |
| lmo0647 | unknown                                                                                  | -          | -2.80 *** |
| lmo0707 | similar to flagellar hook-associated protein 2 FliD                                      | -          | -2.12 *** |
| lmo0711 | similar to flagellar basal-body rod protein flgC                                         | -          | -2.04 *** |
| lmo0721 | putative fibronectin-binding protein                                                     | -2.73 ***  | -         |
| lmo0726 | Hypothetical CDS                                                                         | -          | -3.26 *** |
| lmo0727 | similar to L-glutamine-D-fructose-6-phosphate amidotransferase                           | -          | -3.09 *** |
| lmo0735 | similar to Ribulose-5-Phosphate 3-Epimerase                                              | -          | -2.31 *** |
| lmo0736 | similar to ribose 5-phosphate isomerase                                                  | -          | -2.71 *** |
| lmo0737 | unknown                                                                                  | -          | -2.54 *** |
| lmo0738 | similar to phosphotransferase system (PTS) beta-glucoside-specific enzyme IABC component | -          | -3.38 *** |

|                         |                                                                                                      |           |           |
|-------------------------|------------------------------------------------------------------------------------------------------|-----------|-----------|
| lmo0739                 | similar to 6-phospho-beta-glucosidase                                                                | -         | -7.74 *** |
| lmo0781                 | similar to mannose-specific phosphotransferase system (PTS) component IID                            | -2.04 *   | -         |
| lmo0782                 | similar to mannose-specific phosphotransferase system (PTS) component IIC                            | -2.47 **  | -         |
| lmo0788                 | unknown                                                                                              | -3.67 **  | -         |
| lmo0792                 | similar to conserved hypothetical protein                                                            | -         | -2.04 *** |
| lmo0794                 | similar to <i>B. subtilis</i> YwnB protein                                                           | -         | -2.60 *** |
| lmo0796                 | conserved hypothetical protein                                                                       | -         | -3.71 *** |
| lmo0813                 | similar to fructokinases                                                                             | -3.31 *** | -         |
| lmo0814                 | similar to oxidoreductases                                                                           | -2.36 *** | -         |
| lmo0822                 | similar to transcriptional regulators                                                                | -         | -2.09 *** |
| lmo0829 ( <i>nifJ</i> ) | highly similar to pyruvate-flavodoxin oxidoreductase                                                 | -3.11 *** | -         |
| lmo0864                 | unknown                                                                                              | -2.86 *   | -         |
| lmo0865                 | similar to phosphomannomutase                                                                        | -2.18 *   | -         |
| lmo0912                 | similar to transporters (formate)                                                                    | -4.23 *** | -         |
| lmo0914                 | similar to PTS system, IIB component                                                                 | -2.99 *   | -         |
| lmo0916                 | similar to phosphotransferase system enzyme IIA                                                      | -12.87 ** | -         |
| lmo0917                 | similar to beta-glucosidase                                                                          | -6.00 *   | -         |
| lmo0931                 | similar to lipoate protein ligase A                                                                  | -         | -2.55 *** |
| lmo0940                 | unknown                                                                                              | -2.68 *** | -         |
| lmo0941                 | unknown                                                                                              | -2.47 *** | -         |
| lmo0942                 | similar to heat shock protein HtpG                                                                   | -2.27 *** | -         |
| lmo0943 ( <i>fri</i> )  | non-heme iron-binding ferritin                                                                       | -         | -2.08 *** |
| lmo0944                 | similar to <i>B. subtilis</i> YneR protein                                                           | -         | -4.57 *** |
| lmo0953                 | unknown                                                                                              | -         | -2.28 *** |
| lmo0956                 | similar to N-acetylglucosamine-6P-phosphate deacetylase (EC 3.5.1.25)                                | -2.73 **  | -         |
| lmo0957                 | similar to glucosamine-6-Phosphate isomerase (EC 5.3.1.10)                                           | -         | -2.91 *** |
| lmo0960                 | similar to proteases                                                                                 | -2.28 *   | -         |
| lmo0961                 | similar to proteases                                                                                 | -2.20 *   | -         |
| lmo0971 ( <i>dltD</i> ) | DltD protein for D-alanine esterification of lipoteichoic acid and wall teichoic acid                | -2.20 *** | -         |
| lmo0972 ( <i>dltC</i> ) | D-alanyl carrier protein                                                                             | -2.02 **  | -         |
| lmo0973 ( <i>dltB</i> ) | DltB protein for D-alanine esterification of lipoteichoic acid and wall teichoic acid                | -2.13 *** | -         |
| lmo0974 ( <i>dltA</i> ) | D-alanine-activating enzyme ( <i>dae</i> ), D-alanine-D-alanyl carrier protein ligase ( <i>dcl</i> ) | -2.13 **  | -         |
| lmo1002 ( <i>ptsH</i> ) | PTS phosphocarrier protein Hpr (histidine containing protein)                                        | -         | -3.44 *** |
| lmo1013                 | similar to conserved hypothetical proteins like to <i>B. subtilis</i> YkuT protein                   | -3.00 *** | -         |
| lmo1043                 | similar to molybdopterin-guanine dinucleotide biosynthesis MobB                                      | -2.31 *   | -         |
| lmo1046                 | similar to molybdenum cofactor biosynthesis protein C                                                | -2.37 *   | -         |
| lmo1047                 | similar to molybdenum cofactor biosynthesis protein A                                                | -2.04 **  | -         |
| lmo1051                 | similar to formylmethionine deformylase and to <i>B. subtilis</i> YkrB protein                       | -         | -2.32 *** |
| lmo1057                 | similar to L-lactate dehydrogenase                                                                   | -         | -3.93 *** |
| lmo1058                 | similar to <i>B. subtilis</i> YktA protein                                                           | -         | -4.23 *** |
| lmo1059                 | unknown                                                                                              | -         | -4.42 *** |
| lmo1086                 | similar to CDP-ribitol pyrophosphorylase                                                             | -         | -2.44 *** |
| lmo1087                 | similar to glucitol dehydrogenase                                                                    | -         | -2.20 *   |
| lmo1120                 | unknown                                                                                              | -2.11 *   | -         |
| lmo1121                 | unknown                                                                                              | -2.56 **  | -         |

|                         |                                                                                                                   |            |           |
|-------------------------|-------------------------------------------------------------------------------------------------------------------|------------|-----------|
| lmo1123                 | unknown                                                                                                           | -2.96 **   | -         |
| lmo1124                 | unknown                                                                                                           | -2.40 *    | -         |
| lmo1140                 | unknown                                                                                                           | -2.66 **   | -2.62 *** |
| lmo1253                 | similar to transcription regulator GntR family                                                                    | -          | -2.66 *** |
| lmo1254                 | similar to alpha,alpha-phosphotrehalase                                                                           | -9.60 ***  | -         |
| lmo1255                 | similar to PTS system trehalose specific enzyme IIBC                                                              | -5.19 **   | -         |
| lmo1257                 | unknown                                                                                                           | -36.15 *** | -         |
| lmo1261                 | unknown                                                                                                           | -          | -2.98 *** |
| lmo1293 ( <i>glpD</i> ) | similar to glycerol 3 phosphate dehydrogenase                                                                     | -5.25 **   | -         |
| lmo1303                 | similar to <i>B. subtilis</i> YneA protein                                                                        | -2.12 ***  | -         |
| lmo1348                 | similar to aminomethyltransferase                                                                                 | -3.32 *    | -2.37 *** |
| lmo1349                 | similar to glycine dehydrogenase (decarboxylating) subunit 1                                                      | -4.62 **   | -3.93 *** |
| lmo1350                 | similar to glycine dehydrogenase (decarboxylating) subunit 2                                                      | -5.26 **   | -4.74 *** |
| lmo1369                 | similar to phosphotransbutyrylase                                                                                 | -3.36 **   | -         |
| lmo1371                 | similar to branched-chain alpha-keto acid dehydrogenase E3 subunit                                                | -2.05 ***  | -2.09 *** |
| lmo1372                 | similar to branched-chain alpha-keto acid dehydrogenase E1 subunit (2-oxoisovalerate dehydrogenase alpha subunit) | -2.33 ***  | -         |
| lmo1373                 | similar to branched-chain alpha-keto acid dehydrogenase E1 subunit (2-oxoisovalerate dehydrogenase beta subunit)  | -2.29 ***  | -         |
| lmo1380                 | unknown                                                                                                           | -          | -2.44 *** |
| lmo1388 ( <i>tcsA</i> ) | CD4+ T cell-stimulating antigen, lipoprotein                                                                      | -          | -2.70 **  |
| lmo1389                 | similar to sugar ABC transporter, ATP-binding protein                                                             | -2.02 **   | -         |
| lmo1391                 | similar to sugar ABC transporter, permease protein                                                                | -2.07 **   | -         |
| lmo1399                 | similar to unknown protein                                                                                        | -          | -2.13 *** |
| lmo1406 ( <i>pflB</i> ) | pyruvate formate-lyase                                                                                            | -2.48 ***  | -         |
| lmo1413                 | putative peptidoglycan bound protein (LPXTG motif)                                                                | -2.02 **   | -         |
| lmo1423                 | unknown                                                                                                           | -          | -2.35 *** |
| lmo1424                 | similar to manganese transport proteins NRAMP                                                                     | -2.26 ***  | -5.39 *** |
| lmo1460                 | similar to <i>B. subtilis</i> RecO protein involved in DNA repair and homologous recombination                    | -2.55 ***  | -3.41 *** |
| lmo1463                 | similar to cytidine deaminase                                                                                     | -          | -2.57 *** |
| lmo1464                 | similar to diacylglycerol kinase                                                                                  | -          | -2.35 *** |
| lmo1465                 | similar to unknown proteins                                                                                       | -          | -2.19 *** |
| lmo1466                 | similar to unknown proteins                                                                                       | -          | -2.33 *** |
| lmo1522                 | similar to unknown proteins                                                                                       | -          | -2.82 *** |
| lmo1535                 | similar to unknown proteins                                                                                       | -          | -2.28 **  |
| lmo1538                 | similar to glycerol kinase                                                                                        | -3.62 **   | -         |
| lmo1539                 | similar to glycerol uptake facilitator                                                                            | -4.65 **   | -         |
| lmo1570 ( <i>pykA</i> ) | highly similar to pyruvate kinases                                                                                | -          | -3.26 *** |
| lmo1589 ( <i>argB</i> ) | highly similar to N-acetylglutamate 5-phosphotransferase                                                          | -2.72 *    | -         |
| lmo1590 ( <i>argJ</i> ) | highly similar to ornithine acetyltransferase and amino-acid acetyltransferases                                   | -3.31 *    | -         |
| lmo1591 ( <i>argC</i> ) | similar to N-acetylglutamate gamma-semialdehyde dehydrogenases                                                    | -9.92 **   | -         |
| lmo1604                 | similar to 2-cys peroxiredoxin                                                                                    | -          | -2.31 *** |
| lmo1605 ( <i>murC</i> ) | similar to UDP-N-acetyl muramate-alanine ligases                                                                  | -2.22 ***  | -         |
| lmo1606                 | similar to DNA translocase                                                                                        | -2.47 ***  | -         |
| lmo1608                 | similar to unknown proteins                                                                                       | -          | -2.18 *** |
| lmo1614                 | similar to unknown proteins                                                                                       | -2.13 ***  | -         |
| lmo1626                 | unknown                                                                                                           | -2.29 ***  | -         |
| lmo1627 ( <i>trpA</i> ) | highly similar to tryptophan synthase (alpha subunit)                                                             | -3.70 ***  | -         |

|                          |                                                                              |            |            |
|--------------------------|------------------------------------------------------------------------------|------------|------------|
| lmo1628 ( <i>trpB</i> )  | highly similar to tryptophan synthase (beta subunit)                         | -3.28 ***  | -          |
| lmo1630 ( <i>trpC</i> )  | highly similar to indol-3-glycerol phosphate synthases                       | -2.66 **   | -          |
| lmo1631 ( <i>trpD</i> )  | highly similar to anthranilate phosphoribosyltransferase                     | -3.16 ***  | -          |
| lmo1632 ( <i>trpG</i> )  | highly similar to anthranilate synthase beta subunit                         | -4.31 ***  | -          |
| lmo1634                  | similar to Alcohol-acetaldehyde dehydrogenase                                | -24.49 *** | -          |
| lmo1657 ( <i>tsf</i> )   | translation elongation factor                                                | -          | -2.07 ***  |
| lmo1658 ( <i>rpsB</i> )  | 30S ribosomal protein S2                                                     | -          | -2.07 ***  |
| lmo1683                  | similar to transcription regulators (Fur family), PerR in <i>B. subtilis</i> | -          | -2.65 ***  |
| lmo1687                  | similar to hypothetical proteins                                             | -          | -6.32 ***  |
| lmo1703                  | similar to similar to RNA methyltransferases                                 | -          | -3.14 ***  |
| lmo1727                  | similar to transcription regulators (LacI family)                            | -2.94 **   | -          |
| lmo1728                  | some similarities to cellobiose-phosphorylase                                | -2.41 *    | -          |
| lmo1730                  | similar to sugar ABC transporter binding protein                             | -3.37 *    | -2.16 **   |
| lmo1731                  | similar to sugar ABC transporter, permease protein                           | -2.21 *    | -          |
| lmo1768 ( <i>purF</i> )  | glutamine phosphoribosylpyrophosphate amidotransferase                       | -2.07 *    | -          |
| lmo1793                  | similar to putative 16S rRNA processing protein RimM                         | -          | -2.35 ***  |
| lmo1825                  | similar to pantothenate metabolism flavoprotein homolog                      | -          | -2.09 ***  |
| lmo1848                  | similar metal cations ABC transporter (permease protein)                     | -          | -2.48 ***  |
| lmo1849                  | similar to metal cations ABC transporter, ATP-binding proteins               | -          | -2.42 ***  |
| lmo1862                  | similar to hypothetical proteins                                             | -          | -2.47 ***  |
| lmo1863                  | similar to hypothetical proteins                                             | -          | -2.88 ***  |
| lmo1865                  | similar to conserved hypothetical proteins                                   | -          | -8.51 ***  |
| lmo1866                  | similar to conserved hypothetical proteins                                   | -          | -3.82 ***  |
| lmo1867                  | similar to pyruvate phosphate dikinase                                       | -          | -10.04 *** |
| lmo1879 ( <i>cspD</i> )  | similar to cold shock protein                                                | -8.15 **   | -          |
| lmo1883                  | similar to chitinases                                                        | -9.03 **   | -5.16 ***  |
| lmo1893                  | unknown                                                                      | -          | -2.21 ***  |
| lmo1917 ( <i>pflA</i> )  | similar to pyruvate formate-lyase                                            | -2.78 *    | -          |
| lmo1941                  | similar to unknown proteins                                                  | -          | -2.48 ***  |
| lmo1956 ( <i>fur</i> )   | similar to transcriptional regulator (Fur family)                            | -          | -3.01 ***  |
| lmo1975                  | similar to <i>E. coli</i> DNA-damage-inducible protein dinP                  | -2.88 ***  | -          |
| lmo1994                  | similar to transcription regulators (LacI family)                            | -2.39 ***  | -          |
| lmo1995 ( <i>dra</i> )   | similar to deoxyribose-phosphate aldolase                                    | -2.68 ***  | -          |
| lmo1997                  | similar to PTS mannose-specific enzyme IIA component                         | -12.64 **  | -          |
| lmo1998                  | similar to opine catabolism protein                                          | -12.57 **  | -          |
| lmo1999                  | weakly similar to glucosamine-fructose-6-phosphate                           | -7.81 **   | -          |
| lmo2000                  | similar to PTS mannose-specific enzyme IID component                         | -36.08 **  | -          |
| lmo2001                  | similar to PTS mannose-specific enzyme IIC component                         | -16.00 **  | -          |
| lmo2002                  | similar to PTS mannose-specific enzyme IIB component                         | -3.76 **   | -          |
| lmo2003                  | similar to transcription regulator GntR family                               | -12.52 **  | -          |
| lmo2004                  | similar to transcription regulator GntR family                               | -7.72 **   | -          |
| lmo2016 ( <i>cspB</i> )  | similar to major cold-shock protein                                          | -2.28 **   | -15.39 *** |
| lmo2039 ( <i>pbpB</i> )  | similar to penicillin-binding protein 2B                                     | -2.03 ***  | -          |
| lmo2046                  | weakly similar to ketopantoate reductase involved in thiamin biosynthesis    | -          | -2.06 ***  |
| lmo2063                  | unknown                                                                      | -2.57 ***  | -          |
| lmo2068 ( <i>groEL</i> ) | class I heat-shock protein (chaperonin) GroEL                                | -          | -2.02 ***  |
| lmo2083                  | unknown                                                                      | -2.08 **   | -          |
| lmo2090 ( <i>argG</i> )  | similar to argininosuccinate synthase                                        | -4.80 *    | -          |
| lmo2091 ( <i>argH</i> )  | similar to argininosuccinate lyase                                           | -2.04 **   | -          |
| lmo2099                  | similar to transcription antiterminator                                      | -2.51 *    | -          |

|                         |                                                                                          |            |           |
|-------------------------|------------------------------------------------------------------------------------------|------------|-----------|
| lmo2105                 | similar to ferrous iron transport protein B                                              | -2.36 *    | -         |
| lmo2119                 | similar to unknown proteins                                                              | -          | -2.72 *** |
| lmo2125                 | similar to maltose/maltodextrin ABC-transporter (binding protein)                        | -2.23 *    | -         |
| lmo2132                 | unknown                                                                                  | -          | -2.26 *** |
| lmo2159                 | similar to oxidoreductase                                                                | -9.05 **   | -         |
| lmo2160                 | similar to unknown proteins                                                              | -8.43 **   | -         |
| lmo2161                 | unknown                                                                                  | -7.33 *    | -         |
| lmo2162                 | similar to unknown proteins                                                              | -5.39 **   | -         |
| lmo2163                 | similar to oxidoreductase                                                                | -6.22 *    | -         |
| lmo2173                 | similar to sigma-54-dependent transcriptional activator                                  | -3.93 ***  | -         |
| lmo2175                 | similar to dehydrogenase                                                                 | -6.32 **   | -         |
| lmo2213                 | similar to unknown protein                                                               | -2.03 *    | -         |
| lmo2225 ( <i>citG</i> ) | similar to fumarate hydratase                                                            | -          | -2.09 *** |
| lmo2238                 | similar to transport system permease protein                                             | -3.16 **   | -         |
| lmo2251                 | similar to amino acid ABC transporter (ATP-binding protein)                              | -2.76 *    | -         |
| lmo2332 ( <i>int</i> )  | putative integrase [Bacteriophage A118]                                                  | -2.08 ***  | -         |
| lmo2335 ( <i>fruA</i> ) | highly similar to phosphotransferase system (PTS) fructose-specific enzyme IIA component | -          | -2.78 *** |
| lmo2340                 | similar to <i>Erwinia chrysanthemi</i> IndA protein                                      | -2.35 **   | -2.94 *** |
| lmo2362                 | similar to amino acid antiporter (acid resistance)                                       | -7.78 **   | -8.17 *** |
| lmo2363                 | similar to glutamate decarboxylase                                                       | -5.95 ***  | -7.59 *** |
| lmo2385                 | similar to <i>B. subtilis</i> YuxO protein                                               | -          | -2.00 **  |
| lmo2391                 | conserved hypothetical protein similar to <i>B. subtilis</i> YhFK protein                | -          | -2.12 *** |
| lmo2406                 | similar to <i>B. subtilis</i> YunF protein                                               | -          | -2.72 *** |
| lmo2410                 | unknown                                                                                  | -2.42 ***  | -         |
| lmo2451                 | similar to preprotein translocase subunit SecG                                           | -          | -2.78 *** |
| lmo2452                 | similar to carboxylesterase                                                              | -          | -2.90 *** |
| lmo2453                 | similar to lipolytic enzyme                                                              | -          | -4.28 *** |
| lmo2484                 | similar to <i>B. subtilis</i> YvID protein                                               | -          | -2.26 **  |
| lmo2539 ( <i>glyA</i> ) | highly similar to glycine hydroxymethyltransferase                                       | -          | -2.11 *** |
| lmo2540                 | similar to phosphatases                                                                  | -          | -2.17 *** |
| lmo2579                 | conserved hypothetical protein                                                           | -2.46 ***  | -         |
| lmo2584                 | similar to formate dehydrogenase associated protein                                      | -2.83 *    | -         |
| lmo2585                 | similar to <i>B. subtilis</i> YrhD protein                                               | -4.45 *    | -         |
| lmo2586                 | similar to formate dehydrogenase alpha chain                                             | -2.05 **   | -         |
| lmo2596 ( <i>rpsI</i> ) | ribosomal protein S9                                                                     | -          | -2.11 *** |
| lmo2646                 | unknown                                                                                  | -71.90 *** | -         |
| lmo2647                 | similar to creatinine amidohydrolase                                                     | -14.48 **  | -         |
| lmo2648                 | similar to Phosphotriesterase                                                            | -21.38 **  | -         |
| lmo2649                 | similar to hypothetical PTS enzyme IIC component                                         | -23.67 **  | -         |
| lmo2650                 | similar to hypothetical PTS enzyme IIB component                                         | -51.77 *   | -         |
| lmo2651                 | similar to mannitol-specific PTS enzyme IIA component                                    | -28.46 **  | -         |
| lmo2652                 | similar to transcriptional antiterminator                                                | -3.39 ***  | -         |
| lmo2666                 | similar to PTS system galactitol-specific enzyme IIB component                           | -2.03 *    | -         |
| lmo2667                 | similar to PTS system galactitol-specific enzyme IIA component                           | -2.02 *    | -         |
| lmo2675                 | unknown                                                                                  | -4.51 ***  | -2.18 *** |
| lmo2676                 | similar to UV-damage repair protein                                                      | -3.79 ***  | -2.45 *** |
| lmo2695                 | similar to dihydroxyacetone kinase                                                       | -3.20 *    | -         |
| lmo2696                 | similar to hypothetical dihydroxyacetone kinase                                          | -3.85 *    | -         |

|                         |                                                                    |           |           |
|-------------------------|--------------------------------------------------------------------|-----------|-----------|
| lmo2697                 | unknown                                                            | -2.83 *   | -         |
| lmo2730                 | similar to phosphatase                                             | -2.02 *** | -         |
| lmo2731                 | similar to transcription regulator (RpiR family)                   | -2.39 *** | -         |
| lmo2771                 | similar to beta-glucosidase                                        | -2.42 **  | -         |
| lmo2772                 | similar to beta-glucoside-specific enzyme IIABC                    | -2.14 *   | -         |
| lmo2773                 | similar to transcription antiterminator                            | -2.77 *** | -         |
| lmo2785 ( <i>kat</i> )  | catalase                                                           | -         | -3.72 *** |
| lmo2788 ( <i>bvrA</i> ) | transcription antiterminator                                       | -2.10 *** | -         |
| lmo2795                 | similar to <i>E. coli</i> RpiR transcription regulator             | -3.38 **  | -         |
| lmo2796                 | similar to transcription regulator                                 | -2.46 *   | -         |
| lmo2797                 | similar to phosphotransferase system mannitol-specific enzyme IIA  | -2.06 *   | -         |
| lmo2799                 | similar to phosphotransferase system mannitol-specific enzyme IIBC | -10.46 *  | -         |
| lmo2800                 | similar to dehydrogenase                                           | -7.41 *   | -         |
| lmo2809                 | hypothetical secreted protein                                      | -2.71 *   | -         |
| lmo2820                 | amino-terminal domain similar to transcription regulators          | -2.04 *** | -         |
| lmo2828                 | unknown                                                            | -2.24 *** | -2.87 *** |
| lmo2851                 | similar to AraC-type regulatory protein                            | -         | -2.63 *** |

<sup>a</sup>Genes were considered to be up-regulated at 7°C if the fold change compared to 37°C was  $\geq 2.0$  with an adjusted p-value  $\leq 0.05$

<sup>b</sup>Gene names are from ListiList (<http://genolist.pasteur.fr/ListiList>). Predicted operons are boxed. Operon predictions are from ListiList and Toledo-Arana et al., Nature 459:950-956, 2009.

<sup>c</sup>Gene functions are based on annotation provided by ListiList.

<sup>d</sup>Superscripts are adjusted p values: "\*\*\*\*" (< 0.001), "\*\*\*" (< 0.01), "\*\*" ( $\leq 0.05$ )
