# Supplementary material
Source: PubMed Central journal article supplement (PMC3346412)
Supplement: supp_78.11.3824_AEM-AEM00051-12-s03.pdf [file supp_78.11.3824_AEM-AEM00051-12-s03.pdf]

Table S3. *Listeria monocytogenes* gene groups showing positive or negative enrichment<sup>a</sup> at 7°C compared to 37°C

| Functional Category                                                        | Number of genes in group | Bacteria grown to  |                    |
|----------------------------------------------------------------------------|--------------------------|--------------------|--------------------|
|                                                                            |                          | Log phase          | Stationary phase   |
| <b>Regulons<sup>b</sup></b>                                                |                          |                    |                    |
| CodY                                                                       | 83                       | (-) <sup>***</sup> | (+) <sup>**</sup>  |
| CtsR                                                                       | 18                       | -                  | (-) <sup>*</sup>   |
| HrcA                                                                       | 20                       | (-) <sup>**</sup>  | -                  |
| $\sigma^B$                                                                 | 166                      | (-) <sup>**</sup>  | -                  |
| $\sigma^H$                                                                 | 95                       | (+) <sup>*</sup>   | (-) <sup>**</sup>  |
| $\sigma^L$                                                                 | 31                       | (-) <sup>***</sup> | (-) <sup>*</sup>   |
| <b>Functional categories<sup>c</sup></b>                                   |                          |                    |                    |
| Amino acid biosynthesis: aromatic amino acid family                        | 70                       | (-) <sup>***</sup> | -                  |
| Amino acid biosynthesis: glutamate family                                  | 14                       | (-) <sup>*</sup>   | -                  |
| Cellular processes: chemotaxis and motility                                | 26                       | (+) <sup>***</sup> | -                  |
| Energy metabolism: amino acids and amines                                  | 28                       | (-) <sup>*</sup>   | -                  |
| Energy metabolism: atp-proton motive force interconversion                 | 19                       | -                  | (+) <sup>***</sup> |
| Energy metabolism: biosynthesis and degradation of polysaccharides         | 15                       | (-) <sup>*</sup>   | -                  |
| Energy metabolism: fermentation                                            | 33                       | (-) <sup>*</sup>   | -                  |
| Energy metabolism: pentose pyruvate dehydrogenase                          | 65                       | (-) <sup>***</sup> | -                  |
| Energy metabolism: sugars                                                  | 42                       | (-) <sup>**</sup>  | -                  |
| Protein synthesis: tRNA aminoacylation                                     | 43                       | (-) <sup>*</sup>   | -                  |
| Transport and binding proteins: amino acids, peptides and amines           | 82                       | (+) <sup>***</sup> | -                  |
| Transport and binding proteins: carbohydrates, organic alcohols, and acids | 110                      | (-) <sup>***</sup> | -                  |
| Transport and binding proteins: cations                                    | 59                       | (+) <sup>**</sup>  | -                  |
| Transport and binding proteins: unknown substrate                          | 100                      | (+) <sup>**</sup>  | -                  |
| Viral functions: general                                                   | 47                       | (+) <sup>**</sup>  | -                  |

<sup>a</sup>Reported changes are based on Gene Set Enrichment analysis. (+) indicates that genes comprising group were significantly enriched for higher transcript levels at 7°C compared to 37°C in the same growth phase while (-) indicates significant enrichment for lower transcript levels at 7°C compared to 37°C (i.e. negative enrichment). \*\*\*p < 0.001, \*\*p < 0.01, \*p < 0.05

<sup>b</sup> 7 total regulons were tested for enrichment. PrfA was not included in the table because it was not significantly enriched under any of the conditions tested

<sup>c</sup> Functional categories from The Institute for Genomic Research Comprehensive Microbial Resource: <http://cmr.tigr.org>. Only functional categories containing  $\geq 10$  genes are reported. 74 total functional categories were tested for enrichment, including 39 that contained  $\geq 10$  genes.
