# Supplementary material
Source: PubMed Central journal article supplement (PMC3346412)
Supplement: supp_78.11.3824_AEM-AEM00051-12-s04.pdf [file supp_78.11.3824_AEM-AEM00051-12-s04.pdf]

TABLE S4. Genes differentially transcribed after 5 or 15 min. acid treatment<sup>a</sup> in *L. monocytogenes* grown to log phase at 37 °C.

| Name <sup>b</sup>       | Description of encoded protein <sup>c</sup>                                   | Fold-change <sup>d</sup> |           |
|-------------------------|-------------------------------------------------------------------------------|--------------------------|-----------|
|                         |                                                                               | 5 min                    | 15 min    |
| lmo0047                 | unknown                                                                       | 1.51 *                   | 1.63 **   |
| lmo0111                 | unknown                                                                       | -1.93 ***                | -2.32 *** |
| lmo0130                 | similar to 5-nucleotidase, putative peptidoglycan bound protein (LPXTG motif) | 1.63 **                  | 1.65 **   |
| lmo0135                 | similar to oligopeptide ABC transport system substrate-binding proteins       | 2.36 **                  | 2.27 **   |
| lmo0136                 | similar to oligopeptide ABC transporter, permease protein                     | 2.27 **                  | 2.10 **   |
| lmo0137                 | similar to oligopeptide ABC transporter, permease protein                     | 1.64 **                  | 1.54 *    |
| lmo0152                 | similar to oligopeptide ABC transporter-binding protein                       | 2.15 **                  | 2.36 **   |
| lmo0180                 | similar to sugar ABC transporter, permease protein                            | 1.71 *                   | 1.80 *    |
| lmo0181                 | similar to sugar ABC transporter, sugar-binding protein                       | 1.75 *                   | 1.87 **   |
| lmo0200 ( <i>prfA</i> ) | listeriolysin positive regulatory protein                                     | 1.72 *                   | 1.80 **   |
| lmo0217                 | similar to <i>B. subtilis</i> DivIC protein                                   | -1.56 **                 | -1.96 *** |
| lmo0230                 | similar to <i>B. subtilis</i> YacH protein                                    | 1.53 *                   | 1.56 *    |
| lmo0231                 | similar to arginine kinase                                                    | -                        | 1.60 **   |
| lmo0232 ( <i>clpC</i> ) | endopeptidase Clp ATP-binding chain C                                         | 1.59 **                  | 1.67 **   |
| lmo0238 ( <i>cysE</i> ) | similar to serine O-acetyltransferase                                         | -1.52 *                  | -1.65 **  |
| lmo0269                 | similar to transporter                                                        | -                        | -2.13 **  |
| lmo0278                 | similar to sugar ABC transporter, ATP-binding protein                         | -                        | 1.79 *    |
| lmo0279                 | highly similar to anaerobic ribonucleoside-triphosphate reductase             | -1.63 *                  | -1.64 *   |
| lmo0304                 | unknown                                                                       | -1.53 *                  | -1.61 **  |
| lmo0307                 | unknown                                                                       | -2.36 **                 | -2.04 *   |
| lmo0354                 | similar to fatty-acid--CoA ligase                                             | -2.15 **                 | -2.19 **  |
| lmo0372                 | similar to beta-glucosidase                                                   | -                        | 1.59 *    |
| lmo0412                 | unknown                                                                       | -                        | -2.51 *   |
| lmo0449                 | unknown                                                                       | -1.85 ***                | -2.01 *** |
| lmo0455                 | similar to unknown proteins                                                   | -1.54 *                  | -1.64 **  |
| lmo0490                 | similar to shikimate 5-dehydrogenase                                          | -2.67 **                 | -2.96 **  |
| lmo0496                 | similar to <i>B. subtilis</i> YnzC protein                                    | -                        | 1.52 **   |
| lmo0533                 | similar to unknown proteins                                                   | -1.57 ***                | -1.71 *** |
| lmo0573                 | conserved hypothetical protein                                                | 1.73 *                   | 1.97 **   |
| lmo0604                 | similar to <i>B. subtilis</i> YvlA protein                                    | 1.54 *                   | 1.61 *    |
| lmo0618                 | similar to protein kinase                                                     | -1.51 **                 | -1.56 **  |
| lmo0676                 | similar to flagellar biosynthetic protein FlhP                                | -1.92 ***                | -2.49 *** |
| lmo0680                 | similar to flagella-associated protein flhA                                   | -1.59 **                 | -1.87 *** |
| lmo0681                 | similar to flagellar biosynthesis protein FlhF                                | -1.54 *                  | -1.84 **  |
| lmo0683                 | similar to chemotactic methyltransferase CheR                                 | -2.16 **                 | -2.68 **  |
| lmo0721                 | putative fibronectin-binding protein                                          | -1.56 **                 | -1.54 **  |
| lmo0773                 | similar to alcohol dehydrogenase                                              | -1.79 ***                | -1.81 *** |
| lmo0800                 | similar to <i>B. subtilis</i> YqkB protein                                    | -                        | 1.52 *    |

|                         |                                                                                                                                                 |           |           |
|-------------------------|-------------------------------------------------------------------------------------------------------------------------------------------------|-----------|-----------|
| lmo0806                 | similar to transcription regulator                                                                                                              | -         | 2.03 *    |
| lmo0808                 | similar to spermidine/putrescine ABC transporter, permease protein                                                                              | 1.87 *    | 2.08 *    |
| lmo0809                 | similar to spermidine/putrescine ABC transporter, permease protein                                                                              | 1.90 **   | 2.07 **   |
| lmo0810                 | similar to spermidine/putrescine-binding                                                                                                        | 2.27 **   | 2.25 ***  |
| lmo0811                 | similar to carbonic anhydrase                                                                                                                   | 2.55 **   | 2.78 **   |
| lmo0814                 | similar to oxidoreductases                                                                                                                      | -1.97 **  | -1.78 *   |
| lmo0847                 | similar to Glutamine ABC transporter (binding and transport protein)                                                                            | 2.27 **   | 2.29 **   |
| lmo0848                 | similar to amino acid ABC transporter, ATP-binding protein                                                                                      | 1.82 **   | 1.91 **   |
| lmo0883                 | similar to B. subtilis YbtB protein                                                                                                             | -2.22 *** | -2.81 *** |
| lmo0903                 | conserved hypothetical protein                                                                                                                  | 2.61 **   | 2.65 **   |
| lmo0912                 | similar to transporters (formate)                                                                                                               | -3.98 **  | -4.14 *** |
| lmo0952                 | unknown                                                                                                                                         | -1.56 *** | -1.75 *** |
| lmo0960                 | similar to proteases                                                                                                                            | -2.37 *** | -2.10 **  |
| lmo0997 ( <i>clpE</i> ) | ATP-dependent protease                                                                                                                          | 2.01 **   | 1.83 *    |
| lmo0998                 | similar to hypothetical protein                                                                                                                 | -1.48 **  | -1.89 *** |
| lmo1066                 | similar to extragenic suppressor protein SuhB and to myo-inositol-1(or 4)-monophosphatase                                                       | -1.64 **  | -1.69 **  |
| lmo1089 ( <i>tagD</i> ) | highly similar to glycerol-3-phosphate cytidyltransferase ( <i>gct</i> ), CDP-glycerol pyrophosphorylase (teichoic acid biosynthesis protein D) | -1.86 *** | -2.03 *** |
| lmo1090                 | similar to glycosyltransferases                                                                                                                 | -1.51 **  | -1.64 *** |
| lmo1120                 | unknown                                                                                                                                         | -         | -1.90 *   |
| lmo1138                 | similar to ATP-dependent Clp protease proteolytic component                                                                                     | 1.63 **   | 1.61 **   |
| lmo1257                 | unknown                                                                                                                                         | -5.50 *   | -4.50 *   |
| lmo1266                 | unknown                                                                                                                                         | -2.04 *   | -2.17 *   |
| lmo1294 ( <i>miaA</i> ) | similar to tRNA isopentenylpyrophosphate transferase                                                                                            | -         | -1.67 *** |
| lmo1360 ( <i>folD</i> ) | highly similar to methylenetetrahydrofolate dehydrogenase and methenyltetrahydrofolate cyclohydrolase                                           | -1.81 *** | -2.02 *** |
| lmo1369                 | similar to phosphotransbutyrylase                                                                                                               | -1.80 **  | -1.67 **  |
| lmo1406 ( <i>pflB</i> ) | pyruvate formate-lyase                                                                                                                          | -4.03 *   | -4.30 *   |
| lmo1407 ( <i>pflC</i> ) | pyruvate-formate lyase activating enzyme                                                                                                        | -2.86 *   | -2.72 *   |
| lmo1441                 | similar to putative peptidoglycan acetylation protein                                                                                           | -         | -1.86 **  |
| lmo1474 ( <i>grpE</i> ) | heat shock protein GrpE                                                                                                                         | 1.84 **   | 1.71 **   |
| lmo1475 ( <i>hrcA</i> ) | transcription repressor of class I heat-shock gene HrcA                                                                                         | 1.83 **   | 1.76 **   |
| lmo1500                 | similar to unknown proteins                                                                                                                     | -         | -1.70 *** |
| lmo1544 ( <i>minD</i> ) | highly similar to cell division inhibitor (septum placement) protein MinD                                                                       | -         | -1.52 *** |
| lmo1556 ( <i>hemC</i> ) | highly similar to porphobilinogen deaminases (hydroxymethylbilane synthase)                                                                     | -         | -1.59 *   |
| lmo1557 ( <i>hemA</i> ) | highly similar to glutamyl-tRNA reductase                                                                                                       | -1.72 *** | -1.87 *** |
| lmo1589 ( <i>argB</i> ) | highly similar to N-acetylglutamate 5-phosphotransferase                                                                                        | -         | -4.37 *   |
| lmo1590 ( <i>argJ</i> ) | highly similar to ornithine acetyltransferase and amino-acid acetyltransferases                                                                 | -6.76 *   | -4.84 *   |

|                          |                                                                                        |           |           |
|--------------------------|----------------------------------------------------------------------------------------|-----------|-----------|
| lmo1591 ( <i>argC</i> )  | similar to N-acetylglutamate gamma-semialdehyde dehydrogenases                         | -25.44 *  | -11.04 *  |
| lmo1597                  | unknown                                                                                | -2.69 *** | -3.04 *** |
| lmo1625                  | similar to putative transporters                                                       | -         | -1.53 *** |
| lmo1634                  | similar to Alcohol-acetaldehyde dehydrogenase                                          | -6.66 *   | -6.24 *   |
| lmo1639                  | similar to dna-3-methyladenine glycosidase                                             | -1.54 **  | -1.71 **  |
| lmo1696                  | similar to unknown proteins                                                            | -         | -1.50 **  |
| lmo1710                  | similar to putative flavodoxin                                                         | -         | -1.60 *** |
| lmo1744                  | similar to unknown proteins                                                            | -1.81 **  | -2.18 *** |
| lmo1749                  | similar to shikimate kinase                                                            | -2.46 *** | -2.88 *** |
| lmo1750                  | similar to unknown protein                                                             | -1.66 *   | -1.61 *   |
| lmo1752                  | unknown                                                                                | -         | 1.55 **   |
| lmo1803                  | similar to FtsY of E. coli and SRP receptor alpha-subunit                              | 1.67 **   | 1.70 **   |
| lmo1828                  | similar to conserved hypothetical protein                                              | -1.50 **  | -1.91 *** |
| lmo1833 ( <i>pyrD</i> )  | highly similar to dihydroorotase                                                       | -         | 1.57 **   |
| lmo1835 ( <i>pyrAB</i> ) | highly similar to carbamoyl-phosphate synthetase (catalytic subunit)                   | 1.83 *    | 1.91 **   |
| lmo1840 ( <i>pyrR</i> )  | highly similar to pyrimidine operon regulatory protein                                 | -         | 1.57 *    |
| lmo1856 ( <i>deoD</i> )  | purine nucleoside phosphorylase                                                        | -         | -1.59 *** |
| lmo1857                  | similar to hypothetical protein                                                        | -         | -1.70 *** |
| lmo1867                  | similar to pyruvate phosphate dikinase                                                 | -         | 1.53 **   |
| lmo1884                  | similar to xanthine permeases                                                          | 1.54 *    | 1.53 *    |
| lmo1917 ( <i>pflA</i> )  | similar to pyruvate formate-lyase                                                      | -4.54 *   | -         |
| lmo1926                  | similar to chorismate mutase                                                           | -1.93 **  | -2.52 *** |
| lmo1943                  | similar to unknown proteins                                                            | -1.52 **  | -1.57 **  |
| lmo1965                  | similar to unknown proteins                                                            | -         | -2.52 *   |
| lmo1977                  | similar to unknown proteins                                                            | -         | -1.78 *** |
| lmo1992                  | similar to alpha-acetolactate decarboxylase                                            | 1.68 ***  | 1.65 ***  |
| lmo2006 ( <i>alsS</i> )  | similar to alpha-acetolactate synthase protein, AlsS                                   | -         | 1.52 **   |
| lmo2040 ( <i>ftsL</i> )  | similar to cell-division protein FtsL                                                  | -         | -1.51 *** |
| lmo2041                  | similar to unknown proteins                                                            | -         | -1.68 *** |
| lmo2057 ( <i>ctaB</i> )  | highly similar to heme A farnesyltransferase                                           | 1.60 **   | 1.61 ***  |
| lmo2063                  | unknown                                                                                | -1.78 *** | -1.83 *** |
| lmo2090 ( <i>argG</i> )  | similar to argininosuccinate synthase                                                  | -8.74 *   | -10.59 *  |
| lmo2100                  | similar to transcriptional regulator (GntR family) and to aminotransferase (MocR-like) | 1.61 *    | -2.79 **  |
| lmo2114                  | similar to ABC transporter (ATP-binding protein)                                       | 2.28 **   | 2.25 **   |
| lmo2115                  | similar to ABC transporter (permease)                                                  | 2.23 **   | 2.16 **   |
| lmo2152                  | similar to thioredoxin                                                                 | 1.52 **   | 1.49 **   |
| lmo2156                  | unknown                                                                                | 1.94 ***  | 1.89 ***  |
| lmo2173                  | similar to sigma-54-dependent transcriptional activator                                | -3.11 *   | -3.23 *   |
| lmo2184                  | similar to ferrichrome ABC transporter (binding protein)                               | -         | 1.50 **   |
| lmo2190 ( <i>mecA</i> )  | competence negative regulator mecA                                                     | -         | 1.52 **   |
| lmo2200                  | similar to transcription regulator                                                     | 1.51 *    | 1.49 *    |
| lmo2238                  | similar to transport system permease protein                                           | -3.46 *   | -3.75 **  |

|                         |                                                                                          |           |           |
|-------------------------|------------------------------------------------------------------------------------------|-----------|-----------|
| lmo2241                 | similar to transcriptional regulators (GntR family)                                      | -         | -1.60 **  |
| lmo2250 ( <i>arpJ</i> ) | similar to amino acid ABC transporter, permease protein                                  | -3.89 *   | -3.53 *   |
| lmo2258                 | unknown                                                                                  | 1.56 *    | 1.69 **   |
| lmo2260                 | similar to unknown proteins                                                              | 1.87 *    | 1.78 *    |
| lmo2261                 | similar to unknown proteins                                                              | 1.63 *    | -         |
| lmo2293                 | Protein gp10 [Bacteriophage A118]                                                        | -2.34 *   | -         |
| lmo2295                 | Protein gp8 [Bacteriophage A118]                                                         | -2.88 *   | -2.39 *   |
| lmo2296                 | similar to coat protein [Bacteriophage SPP1]                                             | -2.32 *   | -         |
| lmo2352                 | similar to LysR family transcription regulator                                           | -         | 1.51 *    |
| lmo2362                 | similar to amino acid antiporter (acid)                                                  | -2.97 **  | -2.80 **  |
| lmo2363                 | similar to glutamate decarboxylase                                                       | -2.59 *   | -2.28 *   |
| lmo2380                 | similar to proteins involved in resistance to cholate and to NA(+) and in pH homeostasis | -         | 1.51 *    |
| lmo2393                 | similar to B. subtilis YuzD protein                                                      | 1.71 **   | 1.68 **   |
| lmo2408                 | similar to repressor protein                                                             | -1.61 *** | -1.94 *** |
| lmo2409                 | unknown                                                                                  | -3.28 **  | -4.21 *** |
| lmo2416                 | unknown                                                                                  | -1.78 **  | -1.68 **  |
| lmo2420                 | unknown                                                                                  | -1.73 *** | -2.00 *** |
| lmo2433                 | similar to acetyltransferase                                                             | 1.98 *    | 2.10 **   |
| lmo2439                 | unknown                                                                                  | 1.63 **   | 1.61 **   |
| lmo2468 ( <i>clpP</i> ) | ATP-dependent Clp protease proteolytic                                                   | 1.58 ***  | 1.64 ***  |
| lmo2484                 | similar to B. subtilis YviD protein                                                      | -         | 2.11 *    |
| lmo2487                 | similar to B. subtilis YviB protein                                                      | 1.56 *    | 1.74 **   |
| lmo2569                 | similar to dipeptide ABC transporter (dipeptide-binding protein)                         | 1.74 **   | 1.78 **   |
| lmo2587                 | conserved hypothetical proteins                                                          | -         | -1.61 **  |
| lmo2591                 | surface protein (GW repeat) similar to N-acetylmuramidase                                | 1.58 **   | 1.53 **   |
| lmo2642                 | unknown                                                                                  | -1.89 *   | -2.03 **  |
| lmo2690                 | similar to transcription regulator, TetR family                                          | -         | 1.54 **   |
| lmo2718 ( <i>cydA</i> ) | highly similar to cytochrome D ubiquinol oxidase subunit I                               | -1.59 *   | -         |
| lmo2720                 | similar to acetate-CoA ligase                                                            | -2.07 **  | -1.79 **  |
| lmo2769                 | similar to ABC transporter, ATP-binding                                                  | -2.55 **  | -3.28 *** |
| lmo2827                 | similar to transcriptional regulator (MarR)                                              | 1.50 *    | -         |
| lmo2829                 | similar to yeast protein Frm2p involved in fatty acid signaling                          | -         | 1.60 *    |
| lmo2851                 | similar to AraC-type regulatory protein                                                  | 1.73 *    | -         |

<sup>a</sup>Acid treatment was BHI-MOPS adjusted to pH 3.5 with HCl followed by incubation at 37°C

<sup>b</sup>Gene names are from ListiList (<http://genolist.pasteur.fr/ListiList>). Predicted operons are boxed. Operon predictions are from ListiList and Toledo-Arana et al., Nature 459:950-956, 2009.

<sup>c</sup>gene functions were based on annotation provided by ListiList

<sup>d</sup>Superscripts are adjusted p values: "\*\*\*\*" (< 0.001), "\*\*\*" (< 0.01), "\*\*" (≤ 0.05)
