# Supplementary material
Source: PubMed Central journal article supplement (PMC3346412)
Supplement: supp_78.11.3824_AEM-AEM00051-12-s05.pdf [file supp_78.11.3824_AEM-AEM00051-12-s05.pdf]

TABLE S5. Genes differentially transcribed after 5 or 15 min. acid treatment<sup>a</sup> in *L. monocytogenes* grown to stationary phase at 37 °C

| Name <sup>b</sup>       | Gene Function <sup>c</sup>                                              | Fold change <sup>d</sup> |           |
|-------------------------|-------------------------------------------------------------------------|--------------------------|-----------|
|                         |                                                                         | 5 min                    | 15 min    |
| lmo0104                 | unknown                                                                 | -                        | -1.64 *   |
| lmo0113                 | similar to protein gp35 from Bacteriophage A118                         | -                        | -1.81 *   |
| lmo0114                 | similar to putative repressor C1 from lactococcal bacteriophage Tuc2009 | -                        | -1.57 *   |
| lmo0189                 | highly similar to <i>B. subtilis</i> Veg protein                        | -                        | 1.66 **   |
| lmo0217                 | similar to <i>B. subtilis</i> DivIC protein                             | -2.37 *                  | -3.03 *** |
| lmo0321                 | similar to unknown proteins                                             | -                        | -2.13 **  |
| lmo0351                 | similar to unknown proteins                                             | -1.60 *                  | -1.85 **  |
| lmo0523                 | similar to <i>B. subtilis</i> YybC protein                              | -                        | 6.34 *    |
| lmo0524                 | similar to putative sulfate transporter                                 | -                        | -1.72 *   |
| lmo0578                 | putative conserved membrane protein                                     | -                        | -2.15 **  |
| lmo0648                 | similar to membrane proteins                                            | -                        | -1.83 **  |
| lmo0770                 | similar to transcriptional regulator (LacI family)                      | -                        | -1.68 *   |
| lmo0904                 | unknown                                                                 | -                        | -1.67 *   |
| lmo0998                 | similar to hypothetical protein                                         | -1.63 *                  | -1.60 *   |
| lmo1041                 | similar to molybdate ABC transporter binding protein                    | -                        | -1.66 *   |
| lmo1046                 | molybdenum cofactor biosynthesis protein C                              | -                        | -1.58 *   |
| lmo1049                 | similar to molybdopterin biosynthesis protein MoeB                      | -                        | -1.75 **  |
| lmo1166                 | similar to NADPH-dependent butanol dehydrogenase                        | -                        | -1.84 **  |
| lmo1219                 | unknown                                                                 | -                        | -1.66 *   |
| lmo1227                 | similar to uracil-DNA glycosylase                                       | -                        | -1.55 **  |
| lmo1261                 | unknown                                                                 | -2.89 *                  | -4.46 *** |
| lmo1348                 | similar to aminomethyltransferase                                       | -                        | -2.62 *   |
| lmo1397 ( <i>cinA</i> ) | similar to competence-damage inducible protein CinA                     | -                        | -1.54 *   |
| lmo1411                 | unknown                                                                 | -                        | -1.66 *   |
| lmo1453                 | conserved hypothetical protein                                          | -                        | -2.77 **  |
| lmo1541                 | similar to unknown protein                                              | 1.60 *                   | 1.57 **   |
| lmo1542 ( <i>rplU</i> ) | ribosomal protein L21                                                   | 1.51 *                   | 1.69 ***  |
| lmo1597                 | unknown                                                                 | -                        | -1.75 *   |
| lmo1604                 | 2-cys peroxiredoxin                                                     | -                        | -1.51 *   |
| lmo1605 ( <i>murC</i> ) | UDP-N-acetyl muramate-alanine ligases                                   | -                        | -1.63 *   |
| lmo1614                 | similar to unknown proteins                                             | -                        | 3.99 *    |
| lmo1639                 | similar to dna-3-methyladenine glycosidase                              | -2.06 *                  | -1.83 *   |
| lmo1828                 | similar to conserved hypothetical protein                               | -2.42 ***                | -2.07 **  |
| lmo1856 ( <i>deoD</i> ) | purine nucleoside phosphorylase                                         | -1.59 *                  | -1.65 **  |
| lmo1857                 | similar to hypothetical protein                                         | -                        | -1.57 **  |
| lmo1929 ( <i>ndk</i> )  | similar to nucleoside diphosphate kinase                                | -                        | -1.73 *** |

|                           |                                                                                          |         |           |
|---------------------------|------------------------------------------------------------------------------------------|---------|-----------|
| lmo1932                   | heptaprenyl diphosphate synthase component I                                             | -       | -1.51 *   |
| lmo1939 ( <i>cmk</i> )    | similar to cytidylate kinase                                                             | -       | -1.62 *   |
| lmo1965                   | similar to unknown proteins                                                              | -       | -1.90 *   |
| lmo2020 ( <i>divIVA</i> ) | similar to cell-division initiation protein (septum placement)                           | -       | -1.93 **  |
| lmo2113                   | similar to unknown proteins                                                              | -       | -1.58 **  |
| lmo2129                   | unknown                                                                                  | -       | -1.94 *   |
| lmo2139                   | similar to ABC transporter (ATP-binding protein)                                         | -       | -1.54 **  |
| lmo2176                   | similar to transcriptional regulator (tetR family)                                       | -1.68 * | -1.91 **  |
| lmo2207                   | similar to unknown protein                                                               | -       | -1.68 **  |
| lmo2210                   | unknown                                                                                  | -       | 2.73 *    |
| lmo2248                   | similar to unknown proteins                                                              | -       | -1.57 **  |
| lmo2255                   | unknown                                                                                  | -       | -1.63 *   |
| lmo2293                   | Protein gp10 [Bacteriophage A118]                                                        | -       | 4.28 *    |
| lmo2304                   | Bacteriophage A118 gp65 protein                                                          | -       | 3.03 *    |
| lmo2334                   | similar to transcriptional regulator                                                     | -       | -1.84 *   |
| lmo2362                   | similar to amino acid antiporter (acid resistance)                                       | -       | 1.85 *    |
| lmo2378                   | similar to proteins involved in resistance to cholate and to NA(+) and in pH homeostasis | -       | -1.56 *   |
| lmo2448                   | conserved hypothetical protein                                                           | -       | -1.84 *** |
| lmo2536 ( <i>atpI</i> )   | highly similar to ATP synthase subunit i                                                 | -       | -1.56 *** |
| lmo2586                   | similar to formate dehydrogenase alpha chain                                             | -       | -1.79 *   |
| lmo2625 ( <i>rplP</i> )   | ribosomal protein L16                                                                    | -       | 1.69 *    |
| lmo2630 ( <i>rplW</i> )   | ribosomal protein L23                                                                    | -       | 1.50 *    |
| lmo2632 ( <i>rplC</i> )   | ribosomal protein L3                                                                     | -       | 1.50 *    |
| lmo2633 ( <i>rpsJ</i> )   | ribosomal protein S10                                                                    | -       | 1.64 *    |
| lmo2658                   | similar to spermidine/spermine N1-acetyl transferase                                     | -       | -1.65 **  |
| lmo2741                   | similar to drug-efflux transporters                                                      | -       | -2.62 **  |
| lmo2773                   | similar to transcription antiterminator                                                  | 1.53 *  | 1.72 ***  |

<sup>a</sup>Acid treatment was BHI-MOPS adjusted to pH 3.5 with HCl followed by incubation at 37°C

<sup>b</sup>Gene names are from ListiList (<http://genolist.pasteur.fr/ListiList>). Predicted operons are boxed. Operon predictions are from ListiList and Toledo-Arana et al., Nature 459:950-956, 2009.

<sup>c</sup>gene functions were based on annotation provided by ListiList

<sup>d</sup>Superscripts are adjusted p values: "\*\*\*\*" (< 0.001), "\*\*\*" (< 0.01), "\*\*" (≤ 0.05)
