# Supplementary material
Source: PubMed Central journal article supplement (PMC3346412)
Supplement: supp_78.11.3824_AEM-AEM00051-12-s06.pdf [file supp_78.11.3824_AEM-AEM00051-12-s06.pdf]

TABLE S6. Genes differentially transcribed after 5 or 15 min. acid treatment<sup>a</sup> in *L. monocytogenes* grown to log phase at 7 °C

| Name <sup>b</sup> | Description of encoded protein <sup>c</sup>                    | Fold change <sup>d</sup> |           |
|-------------------|----------------------------------------------------------------|--------------------------|-----------|
|                   |                                                                | 5 min.                   | 15 min.   |
| lmo0066           | similar to toxin components                                    | 1.51 ***                 | -         |
| lmo0071           | unknown                                                        | -                        | -7.13 *   |
| lmo0111           | unknown                                                        | -1.57 ***                | -1.62 *** |
| lmo0133           | similar to <i>E. coli</i> YjdI protein                         | -                        | 1.50 *    |
| lmo0299           | similar to PTS beta-glucoside-specific enzyme IIB component    | -                        | -2.24 *   |
| lmo0306           | unknown                                                        | -1.60 **                 | -1.55 *   |
| lmo0320           | similar to surface protein (peptidoglycan bound, LPXTG motif)  | -                        | 3.64 *    |
| lmo0326           | similar to transcriptional regulators                          | -                        | 2.87 **   |
| lmo0418           | unknown                                                        | 2.63 ***                 | 2.14 ***  |
| lmo0669           | similar to oxidoreductase                                      | 1.35 ***                 | 1.55 ***  |
| lmo0735           | similar to Ribulose-5-Phosphate 3-Epimerase                    | -                        | -3.57 **  |
| lmo0875           | similar to PTS system, beta-glucoside enzyme IIB component     | 1.61 ***                 | -         |
| lmo0883           | similar to <i>B. subtilis</i> YbtB protein                     | -1.41 **                 | -1.72 *** |
| lmo0952           | unknown                                                        | -1.56 ***                | -1.61 **  |
| lmo1114           | highly similar to TN916 ORF23                                  | -                        | -2.02 *   |
| lmo1151           | similar to Salmonella typhimurium PduA protein                 | 1.57 **                  | -         |
| lmo1266           | unknown                                                        | -1.66 ***                | -1.80 *** |
| lmo1639           | similar to dna-3-methyladenine glycosidase                     | -1.49 ***                | -1.55 *** |
| lmo1749           | similar to shikimate kinase                                    | -1.67 ***                | -1.93 *** |
| lmo1883           | similar to chitinases                                          | 1.52 *                   | -         |
| lmo1972           | similar to pentitol PTS system enzyme II B component           | -                        | 1.62 *    |
| lmo2009           | similar to putative transport system integral membrane protein | -                        | 1.63 *    |
| lmo2290           | Portein gp13 [Bacteriophage A118]                              | 1.53 ***                 | -         |
| lmo2291           | major tail shaft protein [Bacteriophage A118]                  | 1.70 ***                 | -         |
| lmo2292           | Portein gp11 [Bacteriophage A118]                              | 1.65 ***                 | 1.54 ***  |
| lmo2300           | putative terminase large subunit from Bacteriophage A118       | -                        | 4.32 *    |
| lmo2408           | similar to repressor protein                                   | -                        | -1.64 *** |
| lmo2409           | unknown                                                        | -                        | -2.26 *** |
| lmo2836           | similar to alcohol dehydrogenase                               | -                        | 2.00 **   |

<sup>a</sup>Acid treatment was BHI-MOPS adjusted to pH 3.5 with HCl followed by incubation at 37°C

<sup>b</sup>Gene names are from ListiList (<http://genolist.pasteur.fr/ListiList>). Predicted operons are boxed. Operon predictions are from ListiList and Toledo-Arana et al., Nature 459:950-956, 2009.

<sup>c</sup>gene functions were based on annotation provided by ListiList (<http://genolist.pasteur.fr/ListiList>).

<sup>d</sup>Superscripts are adjusted p values: "\*\*\*\*" (< 0.001), "\*\*\*" (< 0.01), "\*\*" (≤ 0.05)
