# Supplementary material
Source: PubMed Central journal article supplement (PMC3346412)
Supplement: supp_78.11.3824_AEM-AEM00051-12-s07.pdf [file supp_78.11.3824_AEM-AEM00051-12-s07.pdf]

TABLE S7. Genes differentially transcribed after 5 or 15 min. acid treatment<sup>a</sup> in *L. monocytogenes* grown to stationary phase at 7 °C

| Name <sup>b</sup>       | Gene Function <sup>c</sup>                               | Fold-change <sup>d</sup> |           |
|-------------------------|----------------------------------------------------------|--------------------------|-----------|
|                         |                                                          | 5 min                    | 15 min    |
| lmo0049                 | unknown                                                  | -                        | -1.56 *   |
| lmo0115 ( <i>lmaD</i> ) | similar to Antigen D                                     | 1.99 ***                 | 2.13 ***  |
| lmo0117 ( <i>lmaB</i> ) | antigen B                                                | 5.12 ***                 | 5.32 ***  |
| lmo0118 ( <i>lmaA</i> ) | antigen A                                                | 5.02 ***                 | 5.05 ***  |
| lmo0119                 | unknown                                                  | 3.75 ***                 | 4.04 ***  |
| lmo0120                 | unknown                                                  | 3.80 ***                 | 4.09 ***  |
| lmo0121                 | similar to bacteriophage minor tail proteins             | 4.56 **                  | 3.88 **   |
| lmo0122                 | similar to phage proteins                                | 3.84 ***                 | 3.73 ***  |
| lmo0123                 | similar to protein gp18 from Bacteriophage A118          | 4.86 ***                 | 4.51 ***  |
| lmo0124                 | unknown                                                  | 4.02 ***                 | 4.12 ***  |
| lmo0125                 | unknown                                                  | 4.20 ***                 | 4.12 ***  |
| lmo0126                 | unknown                                                  | 4.99 ***                 | 5.10 ***  |
| lmo0127                 | weakly similar to protein gp20 from Bacteriophage A118   | 5.21 ***                 | 5.09 ***  |
| lmo0128                 | similar to a protein from Bacteriophage phi-105 (ORF 45) | 4.20 ***                 | 4.89 ***  |
| lmo0129                 | similar to autolysin: N-acetylmuramoyl-L-alanine amidase | 3.47 ***                 | 3.94 ***  |
| lmo0217                 | similar to <i>B. subtilis</i> DivIC protein              | -                        | -1.65 *   |
| lmo0328                 | unknown                                                  | -                        | -2.07 *   |
| lmo0728                 | similar to riboflavin kinase / FAD synthase              | -                        | -1.81 *** |
| lmo0883                 | similar to <i>B. subtilis</i> YbtB protein               | -1.83 *                  | -         |
| lmo0903                 | conserved hypothetical protein                           | 2.35 ***                 | 3.15 ***  |
| lmo1049                 | similar to molybdopterin biosynthesis protein MoeB       | -                        | -1.59 *** |
| lmo1631 ( <i>trpD</i> ) | highly similar to anthranilate phosphoribosyltransferase | -                        | 3.09 **   |
| lmo1828                 | similar to conserved hypothetical protein                | -                        | -1.53 *   |
| lmo1856 ( <i>deoD</i> ) | purine nucleoside phosphorylase                          | -                        | -1.63 *   |
| lmo1926                 | similar to chorismate mutase                             | -                        | -1.61 *   |
| lmo2191                 | similar to unknown proteins                              | -                        | -1.55 *** |
| lmo2210                 | unknown                                                  | -                        | -1.53 *   |
| lmo2278 ( <i>lysA</i> ) | L-alanoyl-D-glutamate peptidase                          | -                        | 1.72 **   |
| lmo2279                 | holin [Bacteriophage A118]                               | -                        | 1.74 *    |
| lmo2282                 | protein gp21 [Bacteriophage A118]                        | -                        | 1.75 *    |
| lmo2283                 | protein gp20 [Bacteriophage A118]                        | -                        | 2.07 **   |
| lmo2286                 | protein gp17 [Bacteriophage A118]                        | 1.68 **                  | 1.64 *    |
| lmo2288                 | protein gp15 [Bacteriophage A118]                        | 2.83 ***                 | 2.61 **   |
| lmo2290                 | portein gp13 [Bacteriophage A118]                        | 3.22 **                  | 3.14 **   |
| lmo2291                 | major tail shaft protein [Bacteriophage A118]            | 4.05 ***                 | 5.26 ***  |
| lmo2292                 | protein gp11 [Bacteriophage A118]                        | 4.04 ***                 | 3.42 ***  |
| lmo2293                 | protein gp10 [Bacteriophage A118]                        | 2.89 ***                 | 2.70 ***  |
| lmo2295                 | protein gp8 [Bacteriophage A118]                         | 2.41 ***                 | 2.35 ***  |
| lmo2297                 | putative scaffolding protein [Bacteriophage A118]        | 3.23 ***                 | 2.98 ***  |
| lmo2299                 | putative portal protein [Bacteriophage A118]             | -                        | 1.69 *    |
| lmo2303                 | protein gp66 [Bacteriophage A118]                        | 2.08 **                  | 2.02 ***  |
| lmo2317                 | similar to protein gp49 [Bacteriophage A118]             | -                        | 2.01 **   |
| lmo2322                 | gp44 [Bacteriophage A118]                                | 1.98 *                   | -         |
| lmo2326                 | similar to protein gp41 [Bacteriophage A118]             | 2.18 *                   | 2.27 *    |
| lmo2445                 | similar to internalin                                    | -                        | -2.75 *   |
| lmo2536 ( <i>atpI</i> ) | highly similar to ATP synthase subunit i                 | -                        | -1.66 *** |

<sup>a</sup>Acid treatment was BHI-MOPS adjusted to pH 3.5 with HCl followed by incubation at 37°C

<sup>b</sup>Gene names are from ListiList (<http://genolist.pasteur.fr/ListiList>). Predicted operons are boxed. Operon predictions are from ListiList and Toledo-Arana et al., Nature 459:950-956, 2009.

<sup>c</sup>Gene functions were based on annotation provided by ListiList

<sup>d</sup>Superscripts are adjusted p values: "\*\*\*\*" (< 0.001), "\*\*\*" (< 0.01), "\*\*" (≤ 0.05)
