# Supplementary material
Source: PubMed Central journal article supplement (PMC3346412)
Supplement: supp_78.11.3824_AEM-AEM00051-12-s08.pdf [file supp_78.11.3824_AEM-AEM00051-12-s08.pdf]

TABLE S8. Changes in gene transcript levels for select *L. monocytogenes* acid response genes after acid shock for 5 or 15 min.

| Gene                                               | Bacteria grown to Log phase at |        |                           |              | Bacteria grown to Stationary phase at |              |                           |              |
|----------------------------------------------------|--------------------------------|--------|---------------------------|--------------|---------------------------------------|--------------|---------------------------|--------------|
|                                                    | 7°C                            |        | 37°C                      |              | 7°C                                   |              | 37°C                      |              |
|                                                    | Acid treated for<br>5 min      | 15 min | Acid treated for<br>5 min | 15 min       | Acid treated for<br>5 min             | 15 min       | Acid treated for<br>5 min | 15 min       |
| <b>Decarboxylases</b>                              |                                |        |                           |              |                                       |              |                           |              |
| lmo0011                                            | -1.16                          | -1.11  | 1.15                      | 1.20         | -1.07                                 | 1.11         | 1.01                      | -1.02        |
| lmo0447 ( <i>gadD1</i> )                           | 1.13                           | -1.25  | -1.07                     | -1.10        | -1.05                                 | -1.03        | NA                        | NA           |
| lmo1675                                            | 1.25                           | 1.24   | 1.03                      | 1.03         | 1.03                                  | 1.02         | 1.11                      | 1.16         |
| lmo1832                                            | 1.26                           | 1.26   | 1.58                      | 1.71         | 1.07                                  | -1.03        | NA                        | NA           |
| lmo1900                                            | -1.03                          | -1.07  | -1.01                     | -1.02        | 1.07                                  | 1.08         | -1.13                     | -1.01        |
| lmo1952 ( <i>lysA</i> )                            | 1.05                           | 1.06   | -1.21                     | -1.36        | 1.19                                  | 1.16         | -1.05                     | 1.14         |
| lmo2212 ( <i>hemE</i> )                            | -1.08                          | -1.09  | -1.09                     | -1.15        | -1.09                                 | -1.18        | NA                        | NA           |
| lmo2363 ( <i>gadD2</i> )                           | -1.00                          | -1.23  | <b>-2.59</b>              | <b>-2.28</b> | -1.16                                 | 1.02         | 1.22                      | 1.24         |
| lmo2434 ( <i>gadD3</i> )                           | 1.17                           | 1.19   | 1.17                      | 1.12         | -1.07                                 | -1.13        | -1.04                     | 1.01         |
| lmo2694                                            | -1.07                          | -1.10  | -1.07                     | -1.11        | -1.10                                 | -1.27        | -1.36                     | -1.41        |
| <b>Deiminases</b>                                  |                                |        |                           |              |                                       |              |                           |              |
| lmo0038                                            | 1.16                           | 1.05   | -1.16                     | 1.02         | -1.04                                 | 1.04         | 1.05                      | -1.04        |
| lmo0040                                            | 1.04                           | 1.10   | -1.21                     | -1.17        | NA                                    | NA           | NA                        | NA           |
| lmo0043                                            | 1.08                           | 1.04   | 1.19                      | 1.16         | 1.26                                  | 1.32         | -1.34                     | -1.30        |
| <b>ATP Synthase</b>                                |                                |        |                           |              |                                       |              |                           |              |
| lmo0088                                            | 1.05                           | 1.47   | -1.06                     | 1.09         | 1.10                                  | 1.11         | NA                        | NA           |
| lmo0089                                            | 1.15                           | -1.15  | 1.10                      | 1.07         | -1.19                                 | 1.88         | 1.04                      | 1.01         |
| lmo0090                                            | 1.19                           | 1.20   | -1.07                     | 1.03         | 1.00                                  | -1.17        | 1.10                      | -1.24        |
| lmo0091                                            | 1.10                           | -1.01  | 1.00                      | -1.02        | 1.05                                  | -1.02        | 1.11                      | -1.04        |
| lmo0092                                            | -1.18                          | -1.25  | -1.08                     | -1.01        | NA                                    | NA           | 1.00                      | 1.24         |
| lmo0093                                            | -1.04                          | -1.14  | 1.01                      | -1.04        | 1.00                                  | -1.00        | 1.18                      | 1.13         |
| lmo2528                                            | -1.00                          | 1.00   | 1.02                      | 1.02         | -1.07                                 | -1.02        | 1.05                      | 1.22         |
| lmo2529                                            | 1.01                           | 1.04   | -1.00                     | -1.03        | 1.02                                  | 1.03         | 1.17                      | 1.29         |
| lmo2530                                            | 1.02                           | 1.05   | 1.02                      | 1.01         | -1.03                                 | 1.03         | 1.17                      | 1.22         |
| lmo2531                                            | 1.02                           | 1.04   | -1.07                     | -1.03        | -1.05                                 | -1.10        | 1.16                      | 1.16         |
| lmo2532                                            | 1.05                           | 1.07   | -1.03                     | -1.01        | -1.07                                 | -1.06        | 1.20                      | 1.15         |
| lmo2533                                            | 1.01                           | 1.08   | -1.04                     | -1.03        | 1.06                                  | -1.03        | 1.11                      | 1.22         |
| lmo2534                                            | 1.03                           | 1.08   | -1.04                     | -1.02        | 1.03                                  | -1.10        | 1.03                      | 1.03         |
| lmo2535                                            | 1.02                           | 1.05   | -1.06                     | -1.11        | -1.14                                 | -1.32        | -1.05                     | -1.15        |
| lmo2536                                            | 1.04                           | 1.03   | 1.03                      | -1.01        | -1.40                                 | <b>-1.66</b> | -1.16                     | <b>-1.56</b> |
| <b>Macromolecular repair</b>                       |                                |        |                           |              |                                       |              |                           |              |
| lmo0232 ( <i>clpC</i> )                            | 1.20                           | 1.28   | 1.59                      | 1.67         | 1.02                                  | 1.03         | -1.14                     | -1.13        |
| lmo0292 ( <i>htrA</i> )                            | 1.03                           | 1.07   | 1.43                      | 1.43         | 1.02                                  | -1.01        | -1.05                     | -1.00        |
| lmo0997 ( <i>clpE</i> )                            | -1.07                          | 1.09   | <b>2.01</b>               | <b>1.83</b>  | 1.07                                  | 1.20         | 1.03                      | 1.26         |
| lmo1473 ( <i>dnaK</i> )                            | 1.01                           | -1.01  | 1.60                      | 1.49         | 1.04                                  | 1.07         | -1.02                     | 1.03         |
| lmo1475 ( <i>grpE</i> )                            | -1.08                          | -1.11  | <b>1.83</b>               | <b>1.76</b>  | 1.03                                  | -1.03        | -1.19                     | -1.16        |
| lmo2068 ( <i>groEL</i> )                           | 1.00                           | 1.04   | 1.18                      | 1.04         | 1.00                                  | 1.01         | 1.05                      | 1.15         |
| lmo2069 ( <i>groES</i> )                           | 1.02                           | 1.02   | 1.32                      | 1.18         | 1.05                                  | -1.01        | -1.03                     | -1.03        |
| lmo2206 ( <i>clpB</i> )                            | -1.05                          | 1.04   | 1.42                      | 1.43         | 1.03                                  | 1.13         | -1.06                     | -1.02        |
| lmo2468 ( <i>clpP</i> )                            | 1.02                           | -1.00  | <b>1.58</b>               | <b>1.64</b>  | 1.02                                  | -1.02        | -1.01                     | -1.06        |
| lmo2488 ( <i>uvrA</i> )                            | 1.01                           | 1.00   | 1.19                      | 1.18         | 1.10                                  | 1.09         | 1.04                      | 1.15         |
| lmo2489 ( <i>uvrB</i> )                            | 1.02                           | 1.01   | 1.13                      | 1.12         | 1.05                                  | 1.04         | -1.15                     | -1.12        |
| <b>Other <math>\sigma^B</math>-dependent genes</b> |                                |        |                           |              |                                       |              |                           |              |
| lmo0796                                            | 0.93                           | 0.95   | 0.94                      | 0.89         | 0.96                                  | 0.52         | 1.14                      | 1.11         |
| lmo0913                                            | 0.95                           | 0.93   | 1.31                      | 1.29         | 0.99                                  | 0.54         | 1.23                      | 1.27         |
| lmo2391                                            | 0.88                           | 0.96   | 0.69                      | 0.72         | 0.84                                  | 0.46         | 1.17                      | 1.07         |

<sup>a</sup>Fold changes are based on LIMMA analysis of four biological replicates. Emboldened fold changes indicate statistical significance (adj. p-value  $\geq$  0.05).
